# Supplementary material for: Highly stereocontrolled total synthesis of secodolastane diterpenoid isolinearol
Source: Royal Society of Chemistry journal article supplement (doi:10.1039/d0ob01430c), 2020-01-01
Supplement: d0ob01430c1.pdf [file d0ob01430c1.pdf]

## Highly Stereocontrolled Total Synthesis of Secodolastane Diterpenoid Isolinearol

Toyoharu Kobayashi\*, Yui Tomita, Yuichiro Kawamoto, and Hisanaka Ito\*

*School of Life Sciences, Tokyo University of Pharmacy and Life Sciences,*

*1432-1 Horinouchi, Hachioji, Tokyo 192-0392, Japan*

tkoba@toyaku.ac.jp

itohisa@toyaku.ac.jp

### Table of contents

|                                                                                                                                             |     |
|---------------------------------------------------------------------------------------------------------------------------------------------|-----|
| Experimental procedure                                                                                                                      | S2  |
| <sup>1</sup> H and <sup>13</sup> C NMR spectra of synthetic compounds                                                                       | S27 |
| Chiral HPLC analysis of compound <b>S6</b>                                                                                                  | S52 |
| Comparison of the chemical shifts of <sup>1</sup> H and <sup>13</sup> C NMR spectra of<br>natural products with those of synthetic samples. | S53 |
| X-Ray crystallographic data                                                                                                                 | S54 |

## Experimental procedures

### General

All reactions involving air- and moisture-sensitive reagents were carried out using standard syringe-septum cap techniques. Unless otherwise noted, all solvents and reagents were obtained from commercial suppliers and used without further purification. Routine monitoring of reactions were carried out Merck silica gel 50 F254 TLC plates. Column chromatography was performed on Kanto Chemical silica Gel 60N (spherical, neutral 60-230  $\mu\text{m}$ ) with the solvents indicated. Melting points were taken on Yanako MP-S3 micro melting point apparatus and are uncorrected.  $^1\text{H}$  and  $^{13}\text{C}$  NMR spectra were measured with a Jeol ECZ-400s (400 MHz) spectrometer. Chemical shifts were expressed in ppm using  $\text{CHCl}_3$  (7.26 ppm for  $^1\text{H}$  NMR, 77.0 ppm for  $^{13}\text{C}$  NMR) in  $\text{CDCl}_3$  as an internal standard. Infrared spectral measurements were carried out with a JASCO FT/IR-4700 and only noteworthy absorptions were listed. HRMS spectra measured on a Micromass LCT spectrometer.

Synthesis of 2-(but-3-en-1-yl)-2-methylcyclohexane-1,3-dione (**13**).

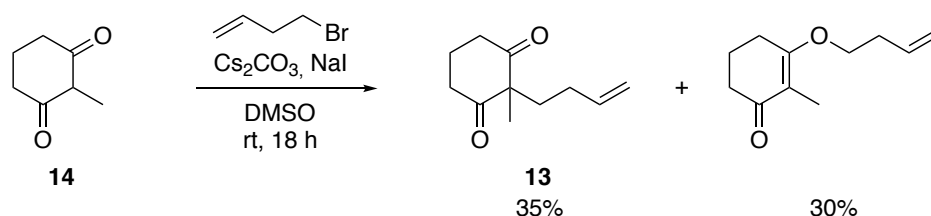

To a stirred solution of 2-methyl-1,3-cyclohexane-1,3-dione **14** (10.0 g, 79.3 mmol) in DMSO (80 mL) was added 4-bromo-1-butene (21.4 g, 16.0 mL, 158.5 mmol),  $\text{Cs}_2\text{CO}_3$  (31.0 g, 95.1 mmol), NaI (17.8 g, 118.9 mmol) at room temperature under Ar, and the mixture was stirred for 18 h at same temperature. The reaction was quenched with  $\text{H}_2\text{O}$  at 0  $^\circ\text{C}$  and the mixture was extracted with AcOEt. The combined organic layers were washed with brine, dried over  $\text{MgSO}_4$ , and concentrated in vacuo. The resulting residue was purified by column chromatography (hexane-AcOEt, 3:1) to afford **13** (5.06 g, 35%) as yellow oil and *O*-butenyl compound (4.29 g, 30%) as yellow oil.

Data for **13**: IR (neat) 2944, 1726, 1695, 1456, 1026  $\text{cm}^{-1}$ ;  $^1\text{H}$  NMR (400 MHz,  $\text{CDCl}_3$ )  $\delta$  1.24 (3H, s), 1.82-1.93 (5H, m), 1.96-2.06 (1H, m), 2.58-2.74 (4H, m), 4.92-5.00 (2H, m), 5.65-5.76 (1H, m);  $^{13}\text{C}$  NMR (100 MHz,  $\text{CDCl}_3$ )  $\delta$  17.6, 19.8, 29.0, 36.2, 38.0 (2C), 65.1, 115.4, 137.4, 210.3 (2C); HRESIMS calcd for  $\text{C}_{11}\text{H}_{16}\text{O}_2\text{Na}$   $[\text{M}+\text{Na}]^+$  203.1048 found 203.1047.

Data for *O*-butenyl compound: IR (neat) 2947, 1617, 1377, 1354, 1095  $\text{cm}^{-1}$ ;  $^1\text{H}$  NMR (400 MHz,  $\text{CDCl}_3$ )  $\delta$  1.69 (3H, t,  $J = 1.8$  Hz), 1.97 (2H, td,  $J = 6.4, 1.9$  Hz), 2.34 (2H, t,  $J = 6.9$  Hz), 2.46 (2H, qt,  $J = 6.4, 1.4$  Hz), 2.54 (2H, td,  $J = 6.4, 1.9$  Hz), 4.04 (2H, t,  $J = 6.4$  Hz), 5.09-5.18 (2H, m), 5.84 (1H, tdd,  $J = 16.9, 10.0, 6.8$  Hz);  $^{13}\text{C}$  NMR (100 MHz,  $\text{CDCl}_3$ )  $\delta$  7.4, 21.0, 25.4, 34.1, 36.3, 67.0, 115.4, 117.6, 133.7, 171.1, 198.9; HRESIMS calcd for  $\text{C}_{11}\text{H}_{16}\text{O}_2\text{Na}$   $[\text{M}+\text{Na}]^+$  203.1048 found 203.1040.

Synthesis of (2*R*\*,3*R*\*)-2-(but-3-en-1-yl)-3-hydroxy-2-methylcyclohexan-1-one (**12**).

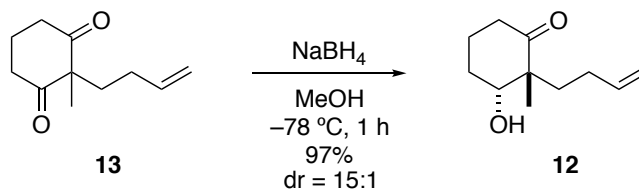

To a stirred solution of **13** (3.67 g, 20.4 mmol) in MeOH (200 mL) was added  $\text{NaBH}_4$  (231 mg, 6.12 mmol) at  $-78^\circ\text{C}$ , and the mixture was stirred for 1 h at same temperature. The reaction was quenched with 1 M HCl aq. and the mixture was extracted with AcOEt. The combined organic layers were washed with brine, dried over  $\text{MgSO}_4$ , and concentrated in vacuo. The resulting residue was purified by column chromatography (hexane-AcOEt, 6:1) to afford **12** (3.62 g, 97%, 15:1 diastereomer mixture) as colorless oil.

IR (neat) 3464, 2941, 1695, 1454, 1060  $\text{cm}^{-1}$ ;  $^1\text{H}$  NMR (400 MHz,  $\text{CDCl}_3$ )  $\delta$  1.17 (3H, s), 1.54-1.63 (2H, m), 1.70-1.85 (2H, m), 1.88-2.06 (4H, m), 2.32-2.44 (2H, m), 3.70 (1H, dd,  $J = 8.5, 3.9$  Hz), 4.94-5.05 (2H, m), 5.75-5.85 (1H, m);  $^{13}\text{C}$  NMR (100 MHz,  $\text{CDCl}_3$ )  $\delta$  18.9, 20.6, 27.6, 28.7, 30.7, 37.6, 54.5, 77.4, 114.7, 138.4, 213.8; HRESIMS calcd for  $\text{C}_{11}\text{H}_{18}\text{O}_2\text{Na}$   $[\text{M}+\text{Na}]^+$  205.1204, found 205.1196.

Synthesis of

(2*R*\*,3*R*\*)-3-(((bromomethyl)dimethylsilyl)oxy)-2-(but-3-en-1-yl)-2-methylcyclohexan-1-one (**S1**).

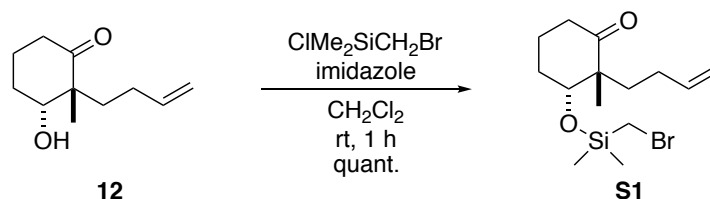

To a stirred solution of **12** (3.79 g, 20.8 mmol) in CH<sub>2</sub>Cl<sub>2</sub> (104 mL) was added imidazole (3.40 g, 49.9 mmol) and ClMe<sub>2</sub>SiCH<sub>2</sub>Br (4.68 g, 3.40 mL, 24.9 mmol) at room temperature under Ar, and the mixture was stirred for 1 h at same temperature. The reaction was quenched with H<sub>2</sub>O and the mixture was extracted with CH<sub>2</sub>Cl<sub>2</sub>. The combined organic layers were washed with brine, dried over MgSO<sub>4</sub>, and concentrated in vacuo. The resulting residue was purified by column chromatography (hexane-AcOEt, 20:1) to afford **S1** (6.90 g, quantitative yield) as colorless oil.

IR (neat) 2952, 1706, 1255, 1082 cm<sup>-1</sup>; <sup>1</sup>H NMR (400 MHz, CDCl<sub>3</sub>) δ 0.26 (6H, s), 1.10 (3H, s), 1.50-1.59 (3H, m), 1.67-1.81 (2H, m), 1.89-2.01 (3H, m), 2.29-2.40 (2H, m), 2.45 (2H, s), 3.72 (1H, t, *J* = 6.4 Hz), 4.93-5.03 (2H, m), 5.79 (1H, tdd, *J* = 16.9, 10.5, 6.0 Hz); <sup>13</sup>C NMR (100 MHz, CDCl<sub>3</sub>) δ -2.6, -2.5, 16.2, 19.1, 20.4, 27.7, 29.4, 30.9, 37.6, 54.8, 78.7, 114.5, 138.6, 213.7; HRESIMS calcd for C<sub>14</sub>H<sub>26</sub>O<sub>2</sub>BrSi [M+H]<sup>+</sup> 333.0885 found 333.0879.

Synthesis of

(1*R*\*,5*S*\*,7*R*\*)-7-(but-3-en-1-yl)-3,3,7-trimethyl-2-oxa-3-silabicyclo[3.2.2]nonan-6-one (**11**).

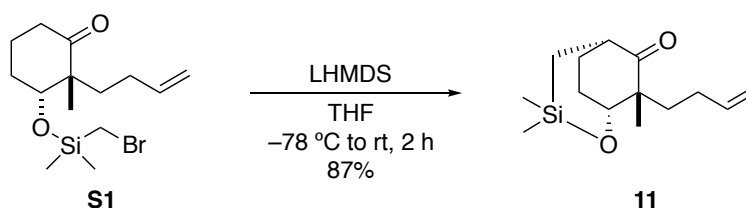



To a stirred solution of **S1** (10.0 g, 30.0 mmol) in THF (300 mL) was added dropwise LHMDS (1.0 M THF, 60 mL, 60.0 mmol) at  $-78\text{ }^{\circ}\text{C}$  room temperature under Ar, and the mixture was stirred for 10 min at same temperature. After the reaction mixture was stirred for 2 h at room temperature, the reaction was quenched with saturated  $\text{NH}_4\text{Cl}$  aqueous solution and the mixture was extracted with AcOEt. The combined organic layers were washed with brine, dried over  $\text{MgSO}_4$ , and concentrated in vacuo. The resulting residue was purified by column chromatography (hexane-AcOEt, 20:1) to afford **11** (6.56 g, 87%) as colorless oil.

IR (neat) 2952, 1706, 1252, 1088  $\text{cm}^{-1}$ ;  $^1\text{H}$  NMR (400 MHz,  $\text{CDCl}_3$ )  $\delta$  0.01 (3H, s), 0.28 (3H, s), 0.94 (1H, dd,  $J = 15.1, 6.0$  Hz), 1.02 (3H, s), 1.08 (1H, ddd,  $J = 15.1, 4.4, 1.6$  Hz), 1.64-1.72 (1H, m), 1.78-1.93 (2H, m), 2.02-2.25 (5H, m), 2.85 (1H, dd,  $J = 10.3, 5.3$  Hz), 4.12 (1H, dd,  $J = 4.4, 1.6$  Hz), 4.92-5.06 (2H, m), 5.83 (1H, tdd,  $J = 16.9, 10.1, 6.4$  Hz);  $^{13}\text{C}$  NMR (100 MHz,  $\text{CDCl}_3$ )  $\delta$  1.2, 3.5, 20.0, 21.2, 23.2, 24.0, 27.2, 33.7, 44.1, 52.0, 73.9, 114.3, 139.0, 218.9; HRESIMS calcd for  $\text{C}_{14}\text{H}_{24}\text{O}_2\text{NaSi}$   $[\text{M}+\text{Na}]^+$  275.1443 found 275.1436.

Synthesis of

(1*R*\*,5*S*\*,6*S*\*,7*R*\*)-7-(but-3-en-1-yl)-3,3,7-trimethyl-6-(2-methylallyl)-2-oxa-3-silabicyclo[3.2.2]nonan-6-ol (**15**).

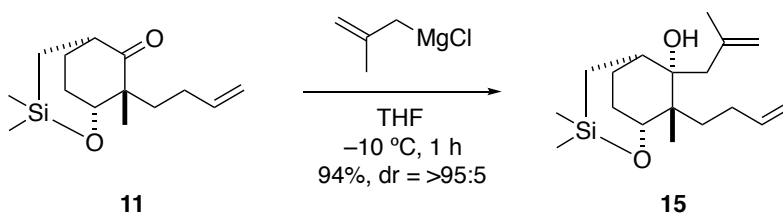

To a stirred solution of **11** (2.80 g, 11.1 mmol) in  $\text{Et}_2\text{O}$  (55 mL) was added dropwise a 2-methylallylmagnesium chloride (0.5 M THF, 44.4 mL, 22.3 mmol) at  $-10\text{ }^{\circ}\text{C}$  under Ar, and the mixture was stirred for 1 h at same temperature. The reaction was quenched with saturated  $\text{NH}_4\text{Cl}$  aqueous solution and the mixture was extracted with AcOEt. The combined organic layers were washed with brine, dried over  $\text{MgSO}_4$ , and concentrated in vacuo. The resulting residue was purified by column chromatography (hexane-AcOEt, 40:1) to afford **15** (3.20 g, 94%) as colorless oil.

IR (neat) 3548, 3067, 2919, 1639, 1477, 1244, 1102  $\text{cm}^{-1}$ ;  $^1\text{H}$  NMR (400 MHz,  $\text{CDCl}_3$ )  $\delta$  0.16 (3H, s), 0.17 (3H, s), 0.53 (1H, dd,  $J = 14.6, 2.7$  Hz), 0.88 (3H, s), 1.21 (1H, ddd,  $J = 14.6, 6.8, 1.8$  Hz), 1.51-1.69 (3H, m), 1.74-1.81 (1H, m), 1.86 (3H, s), 1.97-2.16 (4H, m), 2.25 (1H, 1/2ABq,  $J = 13.3$  Hz), 2.34 (1H, 1/2ABq,  $J = 13.3$  Hz), 2.61-2.65 (1H, m), 3.82 (1H, t,  $J = 3.7$  Hz), 4.79 (1H, brs), 4.93 (1H, d,  $J = 10.5$  Hz), 5.00-5.08 (2H, m), 5.87 (1H, tdd,  $J = 17.2, 10.3, 6.4$  Hz);  $^{13}\text{C}$  NMR (100 MHz,  $\text{CDCl}_3$ )  $\delta$  1.5, 4.2, 20.5, 20.9, 23.9, 25.4, 26.0, 28.5, 33.9, 38.5, 44.8, 45.4, 74.9, 75.5, 113.8, 116.3, 140.1, 143.1; HRESIMS calcd for  $\text{C}_{18}\text{H}_{32}\text{O}_2\text{NaSi}$   $[\text{M}+\text{Na}]^+$  331.2069 found 331.2060.

Synthesis of

(1*S*\*,2*R*\*,3*R*\*,6*R*\*)-2-(but-3-en-1-yl)-6-(hydroxymethyl)-2-methyl-1-(2-methylallyl)cyclohexane-1,3-diol (**10**).

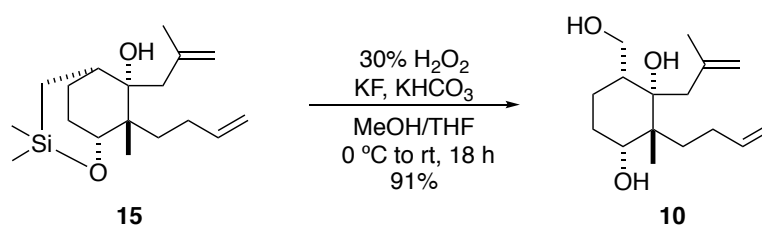

To a stirred solution **15** (100 mg, 0.32 mmol) in MeOH (0.3 mL) and THF (0.3 mL) was added  $\text{KHCO}_3$  (32.0 mg, 0.32 mmol), KF (40.0 mg, 0.65 mmol) and 30%  $\text{H}_2\text{O}_2$  (36.0 mg, 0.08 mL, 1.07 mmol) at 0  $^\circ\text{C}$ , and the mixture was stirred for 30 min at same temperature. After the reaction mixture was stirred for 18 h at room temperature, the reaction was quenched with 50%  $\text{Na}_2\text{S}_2\text{O}_3$  aqueous solution at 0  $^\circ\text{C}$  and the mixture was extracted with AcOEt. The combined organic layers were washed with brine, dried over  $\text{MgSO}_4$ , and concentrated in vacuo. The resulting residue was purified by column chromatography (hexane-AcOEt, 1:1) to afford **10** (79.0 mg, 91%) as a white solid.

M.p. 67-72  $^\circ\text{C}$ ; IR (KBr disk) 3323, 2939, 1739, 1640, 1446, 1243  $\text{cm}^{-1}$ ;  $^1\text{H}$  NMR (400 MHz,  $\text{CDCl}_3$ )  $\delta$  0.88 (3H, s), 1.34-1.40 (1H, m), 1.46-1.56 (1H, m), 1.71-1.86 (3H, m), 1.90 (3H, s), 1.93-2.06 (1H, m), 2.16-2.23 (2H, m), 2.31 (1H, td,  $J = 13.3, 5.0$  Hz), 2.36 (1H, 1/2ABq,  $J = 14.6$  Hz), 2.52 (1H, 1/2ABq,  $J = 14.6$  Hz), 3.61 (1H, dd,  $J = 11.4, 1.8$  Hz), 3.66 (1H, t,  $J = 2.5$  Hz), 4.42 (1H, dd,  $J = 11.4, 2.7$  Hz), 4.86 (2H, d,  $J = 13.3$  Hz), 4.92-4.97 (1H, m), 5.01-5.08 (1H, m), 5.89 (1H, tdd,  $J = 16.9, 10.5, 6.4$  Hz);  $^{13}\text{C}$  NMR

(100 MHz, CDCl<sub>3</sub>)  $\delta$  19.3, 20.2, 24.9, 27.4, 28.2, 30.3, 42.0, 43.7 (2C), 65.6, 73.2, 81.8, 113.9, 114.6, 139.8, 145.0; HRESIMS calcd for C<sub>16</sub>H<sub>28</sub>O<sub>3</sub>Na [M+Na]<sup>+</sup> 291.1936 found 291.1928.

Synthesis of

(1*R*\*,4*R*\*,4*aS*\*,9*aR*\*)-4-(hydroxymethyl)-6,9*a*-dimethyl-1,2,3,4,5,8,9,9*a*-octahydro-4*aH*-benzo[7]annulene-1,4*a*-diol (**16**).

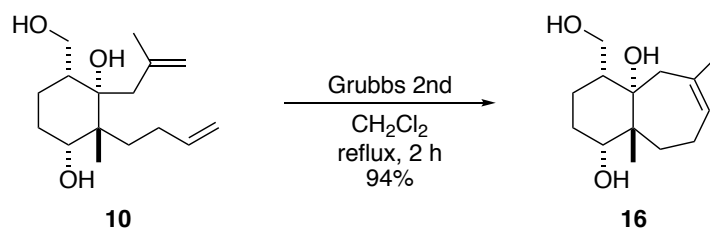

To a stirred solution of **10** (2.00 g, 7.45 mmol) in CH<sub>2</sub>Cl<sub>2</sub> (750 mL) was added Grubbs 2nd generation catalyst (316 mg, 0.37 mmol) at room temperature under Ar, and the mixture was refluxed for 2 h. The solvent was concentrated in vacuo. The resulting residue was purified by column chromatography (hexane-AcOEt, 1:1) to afford **16** (1.68 g, 94%) as a white solid.

M.p. 149-151 °C; IR (KBr disk) 3269, 2922, 1596, 1434, 1057, 1031 cm<sup>-1</sup>; <sup>1</sup>H NMR (400 MHz, CDCl<sub>3</sub>)  $\delta$  1.00 (3H, s), 1.07 (1H, dd, *J* = 13.5, 5.7 Hz), 1.49 (1H, d, *J* = 13.7 Hz), 1.66 (1H, d, *J* = 13.3 Hz), 1.76-1.79 (4H, m), 1.93-2.04 (2H, m), 2.24-2.49 (5H, m), 3.32 (1H, brs), 3.62 (1H, d, *J* = 11.0 Hz), 4.25 (1H, dd, *J* = 11.4, 2.3 Hz), 5.79 (1H, d, *J* = 8.2 Hz); <sup>13</sup>C NMR (100 MHz, CDCl<sub>3</sub>)  $\delta$  19.7, 20.1, 22.9, 27.8, 28.6, 31.5, 38.5, 39.9, 44.1, 65.2, 79.1, 79.3, 127.4, 134.7; HRESIMS calcd for C<sub>14</sub>H<sub>24</sub>O<sub>3</sub>Na [M+Na]<sup>+</sup> 263.1623 found 263.1617.

Synthesis of

(1*R*\*,4*R*\*,4*aS*\*,9*aR*\*)-1-((*tert*-butyldimethylsilyl)oxy)-4-(((*tert*-butyldimethylsilyl)oxy)methyl)-6,9*a*-dimethyl-1,2,3,4,5,8,9,9*a*-octahydro-4*aH*-benzo[7]annulen-4*a*-ol (**17**).

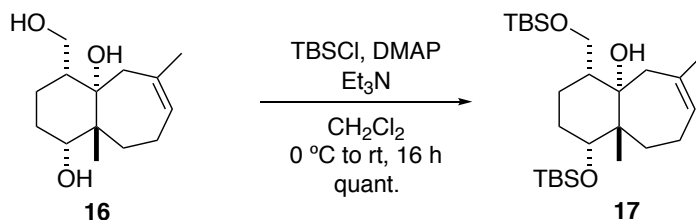

To a stirred solution of **16** (1.68 g, 6.99 mmol) in CH<sub>2</sub>Cl<sub>2</sub> (35 mL) was added Et<sub>3</sub>N (8.49 g, 11.6 mL, 83.9 mmol), 4,4-dimethylaminopyridine (2.56 g, 21.0 mmol) and *tert*-butyldimethylsilyl chloride (4.21 g, 28.0 mmol) at 0 °C under Ar, and the mixture was stirred for 16 h at room temperature. The reaction was quenched with saturated NH<sub>4</sub>Cl aqueous solution and the mixture was extracted with AcOEt. The combined organic layers were washed with brine, dried over MgSO<sub>4</sub>, and concentrated in vacuo. The resulting residue was purified by column chromatography (hexane-AcOEt, 20:1) to afford **17** (3.27 g, quantitative yield) as a white crystal.

M.p. 52-54 °C; IR (KBr disk) 3488, 2929, 2857, 1471, 1389, 1256, 1063 cm<sup>-1</sup>; <sup>1</sup>H NMR (400 MHz, CDCl<sub>3</sub>) δ 0.05 (3H, s), 0.06 (3H, s), 0.07 (3H, s), 0.07 (3H, s), 0.90 (18H, s), 0.99 (3H, s), 1.50-1.57 (2H, m), 1.62-1.76 (2H, m), 1.71 (3H, s), 1.83-1.92 (1H, m), 1.94-2.02 (1H, m), 2.19-2.34 (3H, m), 2.43 (1H, td, *J* = 13.5, 2.7 Hz), 3.37 (1H, dd, *J* = 10.1, 6.4 Hz), 3.40-3.43 (1H, m), 4.04 (1H, dd, *J* = 10.1, 4.6 Hz), 4.25 (1H, d, *J* = 2.3 Hz), 5.53 (1H, d, *J* = 7.8 Hz); <sup>13</sup>C NMR (100 MHz, CDCl<sub>3</sub>) δ -5.34, -5.29, -5.0, -4.7, 17.9, 18.3, 18.7, 19.6, 25.0, 25.8 (3C), 26.0 (3C), 28.64, 28.65, 32.8, 35.7, 43.8, 44.3, 64.7, 77.2, 81.4, 126.7, 130.6; HRESIMS calcd for C<sub>26</sub>H<sub>52</sub>O<sub>3</sub>NaSi<sub>2</sub> [M+Na]<sup>+</sup> 491.3353 found 491.3355.

*tert*-butyl(((1*R*\*,4*R*\*,4*aR*\*,9*aS*\*)-4-((*tert*-butyldimethylsilyl)oxy)-4*a*,8-dimethyl-9*a*-((trimethylsilyl)oxy)-2,3,4,4*a*,5,6,9,9*a*-octahydro-1*H*-benzo[7]annulen-1-yl)methoxy)dimethylsilane (**9**).

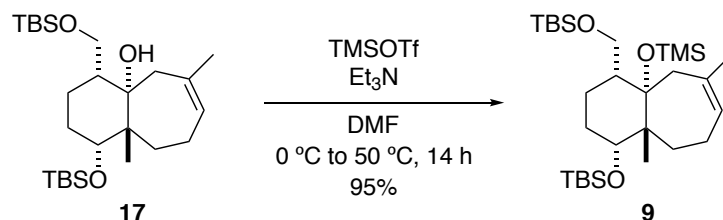

IR (neat) 2955, 2930, 1684  $\text{cm}^{-1}$ ; IR (neat) 2930, 2857, 1255, 1077  $\text{cm}^{-1}$ ;  $^1\text{H}$  NMR (400 MHz,  $\text{CDCl}_3$ )  $\delta$  0.01 (3H, s), 0.03 (3H, s), 0.05 (3H, s), 0.07 (6H, s), 0.09 (6H, s), 0.89 (9H, s), 0.90 (3H, s), 0.91 (9H, s), 1.44-1.54 (1H, m), 1.54-1.61 (2H, m), 1.61-1.80 (3H, m), 1.67 (3H, s), 2.07-2.17 (3H, m), 2.39-2.51 (2H, m), 3.27-3.34 (2H, m), 3.96 (1H, dd,  $J = 9.8, 3.9$  Hz), 5.39-5.43 (1H, m);  $^{13}\text{C}$  NMR (100 MHz,  $\text{CDCl}_3$ )  $\delta$  -5.25, -5.22, -4.6, -4.5, 2.8 (3C), 18.3, 19.47, 19.50, 26.0 (4C), 26.2 (3C), 26.3, 28.5, 30.2, 31.8, 44.1, 44.7, 47.2, 65.3, 79.8, 81.6, 125.4, 130.2; HRESIMS calcd for  $\text{C}_{29}\text{H}_{60}\text{O}_3\text{NaSi}_3$   $[\text{M}+\text{Na}]^+$  563.3748 found 563.3748.

Synthesis of

(1*R*\*,4*R*\*,4*aS*\*,9*aR*\*)-1-((*tert*-butyldimethylsilyl)oxy)-4-(((*tert*-butyldimethylsilyl)oxy)methyl)-6,9*a*-dimethyl-4*a*-((trimethylsilyl)oxy)decahydro-1*H*-benzo[7]annulen-7-ol (**S2**).

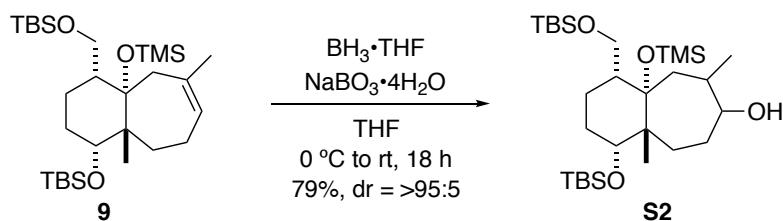

To a stirred solution of **9** (1.56 g, 2.88 mmol) in THF (29 mL) was added dropwise  $\text{BF}_3 \cdot \text{THF}$  (1 M THF, 4.00 mL, 4.03 mmol) at 0 °C under Ar, and the mixture was stirred for 18 h at room temperature. To a reaction mixture was added  $\text{NaBO}_3 \cdot 4\text{H}_2\text{O}$  (2.20 g, 14.4 mmol) at 0 °C and the mixture was stirred for 4 h at room temperature. The reaction was quenched with  $\text{H}_2\text{O}$  and the mixture was extracted with  $\text{Et}_2\text{O}$ . The combined organic layers were washed with brine, dried over  $\text{MgSO}_4$ , and concentrated in vacuo. The resulting residue was purified by column chromatography (hexane-AcOEt, 50:1) to afford **S2** (1.27 g, 79%) as colorless amorphous.

IR (neat) 3347, 2929, 2857, 1471, 1253, 1129, 1075  $\text{cm}^{-1}$ ;  $^1\text{H}$  NMR (400 MHz,  $\text{CDCl}_3$ )  $\delta$  0.02 (3H, s), 0.03 (3H, s), 0.07 (6H, s), 0.14 (3H, s), 0.16 (6H, s), 0.90 (9H, s), 0.91 (9H, s), 0.94 (3H, s), 1.00 (3H, d,  $J = 6.0$  Hz), 1.45-1.70 (6H, m), 1.71-1.99 (5H, m), 2.52 (1H, td,  $J = 14.6, 4.1$  Hz), 3.24-3.38 (2H, m), 3.64 (1H, td,  $J = 10.1, 2.0$  Hz), 3.99 (1H, dd,  $J = 9.4, 3.4$  Hz);  $^{13}\text{C}$  NMR (100 MHz,  $\text{CDCl}_3$ )  $\delta$  -5.2 (2C), -4.8, -4.3, 0.4, 3.5 (3C), 18.3, 19.1, 19.9, 20.6, 26.0 (3C), 26.2 (3C), 30.3, 32.1, 36.9, 39.9, 45.0, 46.0, 49.5, 64.4, 72.8, 79.3, 82.9; HRESIMS calcd for  $\text{C}_{29}\text{H}_{62}\text{O}_4\text{NaSi}_3$   $[\text{M}+\text{Na}]^+$  581.3854 found 581.3856.

Synthesis of

(1*R*\*,4*R*\*,4*aS*\*,9*aR*\*)-1-((*tert*-butyldimethylsilyl)oxy)-4-(((*tert*-butyldimethylsilyl)oxy)methyl)-6,9*a*-dimethyl-4*a*-((trimethylsilyl)oxy)decahydro-7*H*-benzo[7]annulen-7-one  
(**8**)

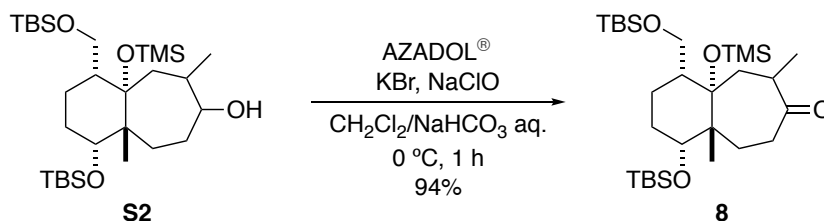

To a stirred solution of **S2** (1.11 g, 1.99 mmol) in CH<sub>2</sub>Cl<sub>2</sub> (5 mL) was added 2-hydroxy-2-azaadamantane (3.00 mg, 19.9 μmol), KBr (24.0 mg, 199 μmol) in NaHCO<sub>3</sub> aqueous solution (2.5 mL), and mixture of NaClO (223 mg, 0.19 mL, 2.99 mmol) aqueous solution and NaHCO<sub>3</sub> aqueous solution (2.5 mL) at 0 °C and the mixture was stirred for 1 h at same temperature. The reaction was quenched with Na<sub>2</sub>S<sub>2</sub>O<sub>3</sub> aqueous solution and the mixture was extracted with CHCl<sub>3</sub>. The combined organic layers were washed with brine, dried over MgSO<sub>4</sub>, and concentrated in vacuo. The resulting residue was purified by column chromatography (hexane-AcOEt, 30:1) to afford **8** (1.04 g, 94%) as colorless oil.

IR (neat) 2929, 2857, 1714, 1252, 1129, 1073 cm<sup>-1</sup>; <sup>1</sup>H NMR (400 MHz, CDCl<sub>3</sub>) δ 0.03-0.11 (21H, m), 0.90 (18H, s), 1.03 (3H, d, *J* = 6.4 Hz), 1.14 (3H, s), 1.41-1.86 (7H, m), 2.01 (1H, dd, *J* = 14.9, 9.8 Hz), 2.38-2.59 (3H, m), 2.89-2.98 (1H, m), 3.31-3.44 (2H, m), 3.91 (1H, dd, *J* = 9.6, 2.7 Hz); <sup>13</sup>C NMR (100 MHz, CDCl<sub>3</sub>) δ -5.22, -5.20, -4.7, -4.3, 2.9 (3C), 17.4, 18.2, 18.3, 19.4, 21.6, 26.0 (3C), 26.2 (3C), 30.3, 31.9, 41.9, 42.1, 44.5, 45.6, 48.4, 64.3, 79.3, 82.7, 212.9; HRESIMS calcd for C<sub>29</sub>H<sub>60</sub>O<sub>4</sub>NaSi<sub>3</sub> [M+Na]<sup>+</sup> 579.3697 found 579.3699.

Synthesis of

(1*R*\*,4*R*\*,4*aS*\*,6*R*\*,9*aR*\*)-6-allyl-1-((*tert*-butyldimethylsilyl)oxy)-4-(((*tert*-butyldimethylsilyl)oxy)methyl)-6,9*a*-dimethyl-4*a*-((trimethylsilyl)oxy)decahydro-7*H*-benzo[7]annulen-7-one (**20**).

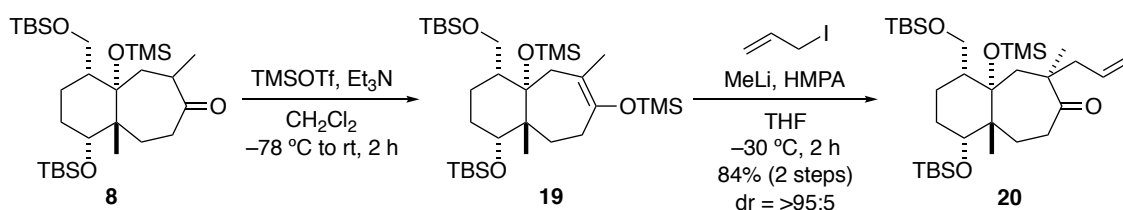

To a stirred solution of **8** (212 mg, 0.38 mmol) in CH<sub>2</sub>Cl<sub>2</sub> (3 mL) was added Et<sub>3</sub>N (461 mg, 0.63 mL, 4.56 mmol) at -78 °C under Ar, and the mixture was stirred for 30 min at same temperature. To a reaction mixture was added trimethylsilyl trifluoromethanesulfonate (338 mg, 0.27 mL, 1.52 mmol) at -78 °C, and the mixture was stirred for 30 min at same temperature. After the mixture was stirred for 1 h at room temperature, the mixture was added to saturated NaHCO<sub>3</sub> aqueous solution and extracted with Et<sub>2</sub>O. The combined organic layers were washed with brine, dried over MgSO<sub>4</sub>, and concentrated in vacuo to give the compound **19**. The obtained **19** was used for next reaction without further purification.

To a solution of **19** obtained above in tetrahydrofuran (4 mL) was added MeLi (1.1 M Et<sub>2</sub>O, 0.71 mL, 0.78 mmol) at 0 °C under Ar, and the mixture was stirred for 20 min at same temperature. To a reaction mixture was added hexamethylphosphoric triamide (140 mg, 0.14 mL, 0.78 mmol) and allyl iodide (197 mg, 0.11 mL, 1.17 mmol) at -30 °C, and the mixture was stirred for 2 h at same temperature. The reaction was quenched with saturated NH<sub>4</sub>Cl aqueous solution and the mixture was extracted with AcOEt. The combined organic layers were washed with brine, dried over MgSO<sub>4</sub>, and concentrated in vacuo. The resulting residue was purified by column chromatography (hexane-AcOEt, 60:1) to afford **20** (191 mg, 84% for 2 steps) as a white solid.

M.p. 96-100 °C; IR (KBr disk) 2929, 1697, 1471, 1253, 1076 cm<sup>-1</sup>; <sup>1</sup>H NMR (400 MHz, CDCl<sub>3</sub>) δ 0.06 (9H, s), 0.08 (3H, s), 0.20 (9H, s), 0.86 (3H, s), 0.90 (9H, s), 0.91 (9H, s), 1.08-1.12 (1H, m), 1.30 (3H, s), 1.55-1.87 (6H, m), 1.94 (1H, d, *J* = 15.6 Hz), 2.14 (1H, 1/2ABqd, *J* = 13.7, 7.8 Hz), 2.28 (1H, 1/2ABqd, *J* = 13.7, 6.8 Hz), 2.46-2.51 (1H, m), 2.59-2.74 (2H, m), 3.35 (1H, dd, *J* = 10.5, 6.9 Hz), 3.45-3.48 (1H, m), 3.94 (1H, dd, *J* =





Synthesis of

(1*R*\*,4*R*\*,4*aS*\*,6*R*\*,9*aR*\*)-6-allyl-1-((*tert*-butyldimethylsilyl)oxy)-4-(hydroxymethyl)-6,9*a*-dimethyl-4*a*-((trimethylsilyl)oxy)decahydro-7*H*-benzo[7]annulen-7-one (**S3**).

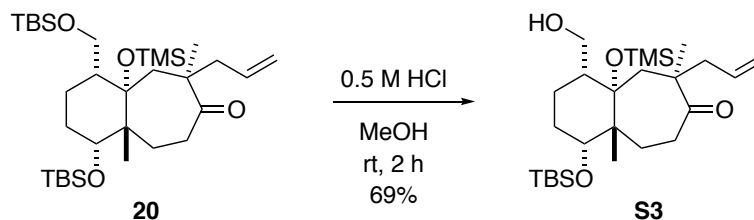

To a stirred solution of **20** (29.2 mg, 49.0  $\mu\text{mol}$ ) in MeOH (0.5 mL) was added 0.5 M HCl aqueous solution (0.2 mL) at room temperature and the mixture was stirred for 2 h at same temperature. The reaction was quenched with saturated  $\text{NaHCO}_3$  aqueous solution and the mixture was extracted with AcOEt. The combined organic layers were washed with brine, dried over  $\text{MgSO}_4$ , and concentrated in vacuo. The resulting residue was purified by column chromatography (hexane-AcOEt, 10:1) to afford **S3** (16.3 mg, 69%) as a white solid.

IR (neat) 3444, 2930, 1694, 1252, 1077  $\text{cm}^{-1}$ ;  $^1\text{H}$  NMR (400 MHz,  $\text{CDCl}_3$ )  $\delta$  0.06 (3H, s), 0.08 (3H, s), 0.21 (9H, s), 0.87 (3H, s), 0.92 (9H, s), 1.09-1.15 (1H, m), 1.31 (3H, s), 1.53-1.71 (4H, m), 1.78-1.88 (2H, m), 1.92 (1H, d,  $J = 15.6$  Hz), 2.16 (1H, 1/2ABqd,  $J = 13.7, 8.2$  Hz), 2.27 (1H, 1/2ABqd,  $J = 13.7, 6.9$  Hz), 2.47-2.53 (1H, m), 2.59-2.76 (2H, m), 3.44 (1H, dd,  $J = 10.3, 8.0$  Hz), 3.47-3.49 (1H, m), 4.01 (1H, dd,  $J = 10.3, 3.9$  Hz), 4.99-5.08 (2H, m), 5.72 (1H, tdd,  $J = 17.2, 9.8, 7.6$  Hz);  $^{13}\text{C}$  NMR (100 MHz,  $\text{CDCl}_3$ )  $\delta$  -4.2, -4.1, 4.1 (3C), 18.7, 19.7, 21.6, 22.6, 26.5 (3C), 29.1, 29.5, 38.3, 45.0, 46.0, 46.3, 46.6, 49.7, 64.6, 79.3, 83.0, 118.2, 134.5, 215.5; HRESIMS calcd for  $\text{C}_{26}\text{H}_{50}\text{O}_4\text{NaSi}_2$   $[\text{M}+\text{Na}]^+$  505.3145 found 505.3147.

Synthesis of

((1*R*\*,4*R*\*,4*aR*\*,8*R*\*,9*aS*\*)-8-allyl-4-((*tert*-butyldimethylsilyl)oxy)-4*a*,8-dimethyl-7-oxo-9*a*-((trimethylsilyl)oxy)decahydro-1*H*-benzo[7]annulen-1-yl)methyl 4-methylbenzenesulfonate (**22**).

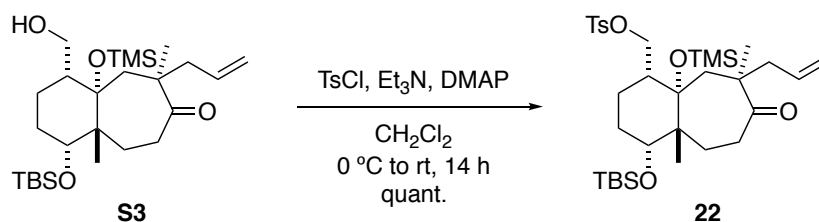

To a stirred solution of **S3** (20.0 mg, 41.4  $\mu\text{mol}$ ) in  $\text{CH}_2\text{Cl}_2$  (2 mL) was added  $\text{Et}_3\text{N}$  (16.6 mg, 0.02 mL, 0.16 mmol), 4,4-dimethylaminopyridine (5.5 mg, 45.0  $\mu\text{mol}$ ) and *p*-toluenesulfonyl chloride (16.0 mg, 82.8  $\mu\text{mol}$ ) at 0  $^\circ\text{C}$  and the mixture was stirred for 2 h at room temperature. The reaction was quenched with saturated  $\text{NH}_4\text{Cl}$  aqueous solution and the mixture was extracted with  $\text{CH}_2\text{Cl}_2$ . The combined organic layers were washed with brine, dried over  $\text{MgSO}_4$ , and concentrated in vacuo. The resulting residue was purified by column chromatography (hexane-AcOEt, 10:1) to afford **22** (26.0 mg, 99%) as a white solid.

M.p. 79-89  $^\circ\text{C}$ ; IR (KBr disk) 2932, 1703, 1357, 1254, 1181, 1128  $\text{cm}^{-1}$ ;  $^1\text{H}$  NMR (400 MHz,  $\text{CDCl}_3$ )  $\delta$  -0.06 (3H, d,  $J = 2.7$  Hz), 0.03 (3H, s), 0.05 (3H, s), 0.09 (9H, s), 0.80 (3H, s), 0.84-0.90 (10H, m), 0.97 (1H, d,  $J = 6.4$  Hz), 1.06-1.13 (1H, m), 1.20 (3H, s), 1.43-1.51 (1H, m), 1.56-1.64 (4H, m), 1.65-1.97 (2H, m), 2.07 (1H, dd,  $J = 13.7, 8.2$  Hz), 2.22 (1H, dd,  $J = 13.7, 6.9$  Hz), 2.40-2.50 (3H, m), 2.54-2.70 (2H, m), 3.42-3.46 (1H, m), 3.72-3.79 (1H, m), 4.28 (1H, dd,  $J = 9.4, 3.9$  Hz), 4.94-5.08 (2H, m), 5.58-5.72 (1H, m);  $^{13}\text{C}$  NMR (100 MHz,  $\text{CDCl}_3$ )  $\delta$  -4.3, -4.1, 3.9 (3C), 18.6, 19.7, 21.5, 21.6, 22.6, 26.4 (3C), 29.0, 38.0, 43.2, 45.0, 46.0, 46.2, 49.5, 72.5, 77.2, 78.9, 82.7, 118.4, 128.0 (2C), 129.9 (2C), 132.7, 134.2, 145.0, 214.8; HRESIMS calcd for  $\text{C}_{33}\text{H}_{56}\text{O}_6\text{NaSSi}_2$   $[\text{M}+\text{Na}]^+$  659.3234 found 659.3242.

Synthesis of

(1*R*\*,4*S*\*,4*aS*\*,6*R*\*,9*aR*\*)-6-allyl-1-((*tert*-butyldimethylsilyl)oxy)-6,9*a*-dimethyl-4-((phenylselanyl)methyl)-4*a*-((trimethylsilyl)oxy)decahydro-7*H*-benzo[7]annulen-7-one (**S4**).

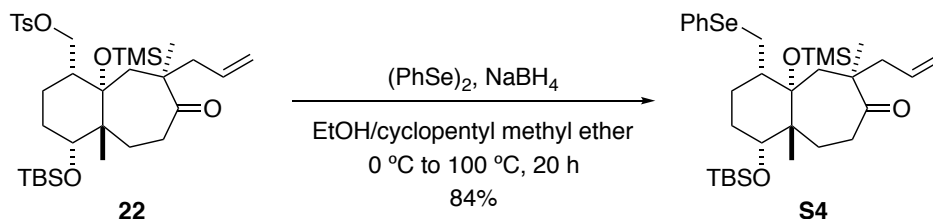

To a stirred solution of diphenyl diselenide (26.5 mg, 84.8  $\mu\text{mol}$ ) in EtOH (0.4 mL) was added sodium borohydride (6.43 mg, 0.17 mmol) at 0  $^\circ\text{C}$  and the mixture was stirred for 10 min at room temperature. The mixture was added dropwise to a stirred solution of **22** (27.0 mg, 42.4  $\mu\text{mol}$ ) in cyclopentyl methyl ether (0.2 mL) at room temperature and the mixture was stirred for 20 h at 100  $^\circ\text{C}$ . To the reaction mixture was added Et<sub>2</sub>O and saturated NH<sub>4</sub>Cl aqueous solution then the mixture was extracted with Et<sub>2</sub>O. The combined organic layers were washed with brine, dried over MgSO<sub>4</sub>, and concentrated in vacuo. The resulting residue was purified by column chromatography (hexane-AcOEt, 20:1) to afford **S4** (22.1 mg, 84%) as colorless oil.

IR (neat) 2928, 1696, 1472, 1253, 1132, 1080  $\text{cm}^{-1}$ ; <sup>1</sup>H NMR (400 MHz, CDCl<sub>3</sub>)  $\delta$  0.05 (3H, s), 0.07 (3H, s), 0.22 (9H, s), 0.76 (3H, s), 0.91 (9H, s), 0.96-1.17 (2H, m), 1.25-1.30 (1H, m), 1.29 (3H, s), 1.58-1.87 (5H, m), 2.08 (1H, 1/2ABqd,  $J$  = 13.7, 8.2 Hz), 2.19 (1H, 1/2ABqd,  $J$  = 13.5, 6.6 Hz), 2.44-2.74 (4H, m), 3.30 (1H, dd,  $J$  = 11.7, 2.1 Hz), 3.43-3.48 (1H, m), 4.97-5.07 (2H, m), 5.62-5.74 (1H, m), 7.25-7.28 (3H, m), 7.46-7.51 (2H, m); <sup>13</sup>C NMR (100 MHz, CDCl<sub>3</sub>)  $\delta$  -4.2, -4.0, 4.3 (3C), 18.7, 21.7, 21.9, 22.8, 26.5 (3C), 29.4, 29.7, 31.3, 38.2, 44.8 (2C), 46.2, 46.3, 49.5, 77.2, 79.5, 83.8, 118.2, 127.1, 129.2 (2C), 133.0 (2C), 134.4, 215.3; HRESIMS calcd for C<sub>32</sub>H<sub>54</sub>O<sub>3</sub>NaSeSi<sub>2</sub> [M+Na]<sup>+</sup> 645.2674 found 645.2679.

## Synthesis of

(1*R*\*,4*aS*\*,6*R*\*,9*aR*\*)-6-allyl-1-((*tert*-butyldimethylsilyl)oxy)-6,9a-dimethyl-4-methylene-4a-((trimethylsilyl)oxy)decahydro-7*H*-benzo[7]annulen-7-one (**23**).

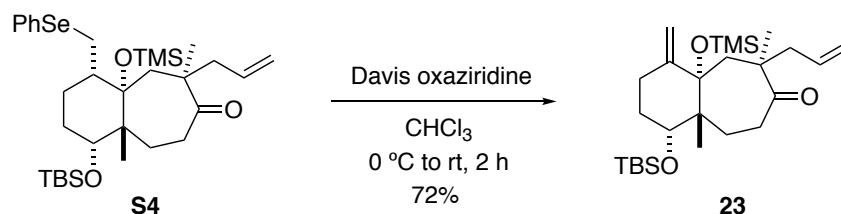

To a stirred solution of **S4** (11.0 mg, 17.9  $\mu\text{mol}$ ) in  $\text{CHCl}_3$  (2 mL) was added Davis oxaziridine (11.7 mg, 44.8  $\mu\text{mol}$ ) at  $0^\circ\text{C}$  under Ar and the mixture was stirred for 2 h at room temperature. The mixture was concentrated in vacuo. The resulting residue was purified by column chromatography (hexane-AcOEt, 40:1) to afford **23** (6.0 mg, 72%) as colorless amorphous.

IR (neat) 2930, 1695, 1464, 1251, 1017  $\text{cm}^{-1}$ ;  $^1\text{H}$  NMR (400 MHz,  $\text{CDCl}_3$ )  $\delta$  0.05 (3H, s), 0.06 (3H, s), 0.15 (9H, s), 0.65 (3H, s), 0.93 (9H, s), 1.15-1.18 (1H, m), 1.39 (3H, s), 1.60-1.63 (1H, m), 1.71 (1H, 1/2ABq,  $J = 15.1$  Hz), 1.75-1.90 (2H, m), 1.95 (1H, 1/2ABq,  $J = 15.1$  Hz), 2.20 (1H, 1/2ABqd,  $J = 13.5, 8.0$  Hz), 2.32 (1H, 1/2ABqd,  $J = 13.7, 6.9$  Hz), 2.54-2.57 (2H, m), 2.94-3.02 (2H, m), 3.41-3.44 (1H, m), 4.84 (1H, s), 4.96 (1H, s), 5.02-5.08 (2H, m), 5.80 (1H, tdd,  $J = 17.2, 9.4, 7.8$  Hz);  $^{13}\text{C}$  NMR (100 MHz,  $\text{CDCl}_3$ )  $\delta$  -5.0, -4.1, 3.2 (3C), 18.3, 19.7, 22.0, 26.1 (3C), 27.6, 28.1, 31.4, 38.9, 43.2, 46.4, 46.5, 49.9, 79.8, 80.6, 110.8, 118.0, 135.1, 151.7, 216.1; HRESIMS calcd for  $\text{C}_{26}\text{H}_{48}\text{O}_3\text{NaSi}_2$   $[\text{M}+\text{Na}]^+$  487.3040 found 487.3038.

## Synthesis of



### Synthesis of

3-((1*R*\*,4*aS*\*,6*R*\*,9*aR*\*)-1-((*tert*-butyldimethylsilyl)oxy)-6,9a-dimethyl-4-methylene-7-oxo-4a-((trimethylsilyl)oxy)decahydro-1*H*-benzo[7]annulen-6-yl)propanal (**25**).

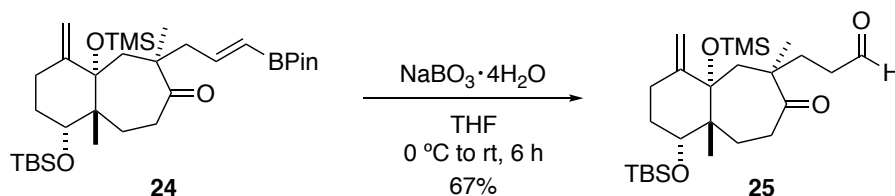

To a stirred solution of **24** (56.8 mg, 96.1  $\mu\text{mol}$ ) in tetrahydrofuran (0.5 mL) and  $\text{H}_2\text{O}$  (0.5 mL) was added sodium peroxoborate tetrahydrate (59.0 mg, 0.38 mmol) at 0 °C and the mixture was stirred for 6 h at room temperature. The reaction was quenched with  $\text{H}_2\text{O}$  and the mixture was extracted with  $\text{Et}_2\text{O}$ . The combined organic layers were washed with brine, dried over  $\text{MgSO}_4$ , and concentrated in vacuo. The resulting residue was purified by column chromatography (hexane-AcOEt, 30:1) to afford **25** (31.0 mg, 67%) as white amorphous.

IR (neat) 2930, 1707, 1251, 1103  $\text{cm}^{-1}$ ;  $^1\text{H}$  NMR (400 MHz,  $\text{CDCl}_3$ )  $\delta$  0.04 (3H, s), 0.05 (3H, s), 0.14 (9H, s), 0.64 (3H, s), 0.92 (9H, s), 1.13-1.20 (1H, m), 1.41 (3H, s), 1.56-1.73 (2H, m), 1.74-1.83 (2H, m), 1.86-2.03 (3H, m), 2.40-2.44 (2H, m), 2.51-2.55 (2H, m), 2.92-3.02 (2H, m), 3.39-3.44 (1H, m), 4.83 (1H, s), 4.96 (1H, s), 9.77 (1H, brs);  $^{13}\text{C}$  NMR (100 MHz,  $\text{CDCl}_3$ )  $\delta$  -5.0, -4.1, 3.2 (3C), 18.3, 19.6, 21.5, 26.1 (3C), 27.6, 28.1, 31.3, 33.9, 38.9, 39.5, 44.2, 46.6, 49.5, 79.8, 80.7, 110.9, 151.4, 202.3, 215.8; HRESIMS calcd for  $\text{C}_{26}\text{H}_{48}\text{O}_4\text{NaSi}_2$   $[\text{M}+\text{Na}]^+$  503.2989 found 503.2989.

### Synthesis of

(1*R*\*,4*aS*\*,6*R*\*,9*aR*\*)-1-((*tert*-butyldimethylsilyl)oxy)-6,9a-dimethyl-6-(4-methyl-3-oxopentyl)-4-methylene-4a-((trimethylsilyl)oxy)decahydro-7*H*-benzo[7]annulen-7-one (**7**).

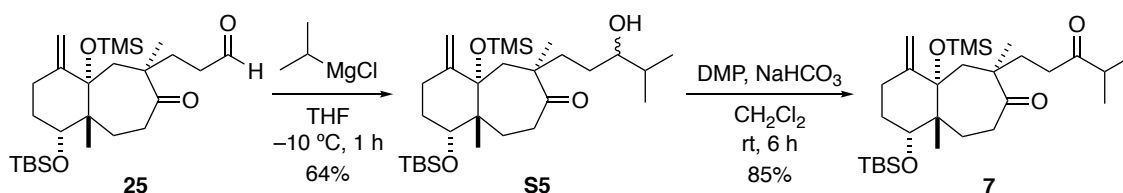





conc. HCl at room temperature and the mixture was stirred for 20 min at same temperature. The reaction was quenched with saturated NaHCO<sub>3</sub> aqueous solution and the mixture was extracted with AcOEt. The combined organic layers were washed with brine, dried over MgSO<sub>4</sub>, and concentrated in vacuo. The resulting residue was purified by column chromatography (hexane-AcOEt, 2:1) to afford **1** (1.8 mg, 93%) as a white solid.

M.p. 91-99 °C; IR (KBr disk) 3355, 2947, 1705, 1472, 1089, 1023 cm<sup>-1</sup>; <sup>1</sup>H NMR (400 MHz, CDCl<sub>3</sub>) δ 0.67 (3H, s), 1.01 (3H, s), 1.11 (6H, d, *J* = 6.9 Hz), 1.63-1.78 (4H, m), 1.80-1.86 (2H, m), 1.88-2.01 (3H, m), 2.14-2.28 (2H, m), 2.48 (1H, qq, *J* = 6.9, 6.9 Hz), 2.56-2.68 (2H, m), 2.69-2.79 (1H, m), 3.55-3.59 (1H, m), 4.82 (1H, brs), 4.97 (1H, brs); <sup>13</sup>C NMR (100 MHz, CDCl<sub>3</sub>) δ 18.3, 18.4, 22.3, 22.6, 27.3, 29.5, 31.9, 32.0, 33.1, 35.8, 39.8, 40.9, 41.0, 43.2, 78.6, 86.0, 105.5, 110.2, 146.5, 214.8; HRESIMS calcd for C<sub>20</sub>H<sub>32</sub>O<sub>4</sub>Na [M+Na]<sup>+</sup> 359.2198 found 359.2191.

Synthesis of (2*R*,3*R*)-2-(but-3-en-1-yl)-3-hydroxy-2-methylcyclohexan-1-one (–)-**12**.

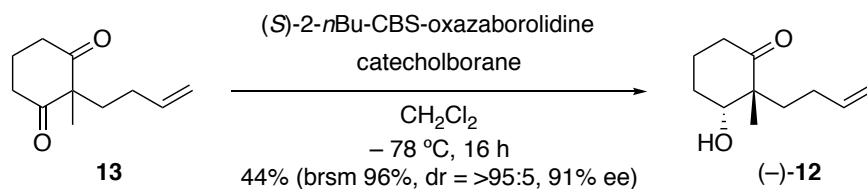

To a stirred solution of (*S*)-2-*n*Bu-CBS-oxazaborolidine (1 M toluene, 0.14 mL, 0.14 mmol) in CH<sub>2</sub>Cl<sub>2</sub> (3 mL) was added dropwise catecholborane (66.0 mg, 0.06 mL, 0.55 mmol) at 0 °C under Ar and the mixture was stirred for 30 min at same temperature. The mixture was added dropwise to a stirred solution of **13** (740 mg, 4.10 mmol) in CH<sub>2</sub>Cl<sub>2</sub> (3 mL) at –78 °C under Ar and the mixture was stirred for 16 h at same temperature. The reaction was quenched with MeOH and 1 M HCl and the mixture was extracted with CH<sub>2</sub>Cl<sub>2</sub>. The combined organic layers were washed with brine, dried over MgSO<sub>4</sub>, and concentrated in vacuo. The resulting residue was purified by column chromatography (hexane-AcOEt, 10:1) to afford (–)-**12** (328 mg, 44%, brsm 96%) as colorless oil and **13** (397 mg, 54%) as yellow oil.

Optical rotation of (2*R*,3*R*)-2-(but-3-en-1-yl)-3-hydroxy-2-methylcyclohexan-1-one (–)-(12);  $[\alpha]_{\text{D}}^{25} = -38.5$  (*c* 1.01, CHCl<sub>3</sub>).

Synthesis of (1*R*,2*R*)-2-(but-3-en-1-yl)-2-methyl-3-oxocyclohexyl acetate (–)-(26).

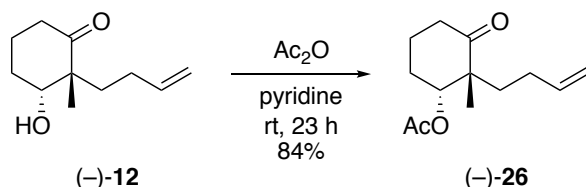

To a stirred solution of (–)-12 (56.5 mg, 0.31 mmol) in CH<sub>2</sub>Cl<sub>2</sub> (1 mL) was added pyridine (1 mL) and acetic anhydride (108 mg, 0.1 mL, 1.06 mmol) at room temperature under Ar and the mixture was stirred for 23 h at same temperature. The reaction was quenched with H<sub>2</sub>O and 1 M HCl aqueous solution and the mixture was extracted with AcOEt. The combined organic layers were washed with brine, dried over MgSO<sub>4</sub>, and concentrated in vacuo. The resulting residue was purified by column chromatography (hexane-AcOEt, 3:1) to afford (–)-26 (58.6 mg, 84%) as colorless oil.

$[\alpha]_{\text{D}}^{25} = -27.4$  (*c* = 0.30, CHCl<sub>3</sub>); IR (neat) 2952, 1739, 1713, 1374, 1237, 1035 cm<sup>–1</sup>; <sup>1</sup>H NMR (400 MHz, CDCl<sub>3</sub>)  $\delta$  1.13 (3H, s), 1.56–2.03 (8H, m), 2.05 (3H, s), 2.33–2.54 (2H, m), 4.89 (1H, dd, *J* = 7.8, 3.7 Hz), 4.92–5.05 (2H, m), 5.71–5.85 (1H, m); <sup>13</sup>C NMR (100 MHz, CDCl<sub>3</sub>)  $\delta$  19.3, 20.6, 21.0, 25.6, 27.5, 31.5, 37.5, 52.5, 78.2, 114.7, 138.3, 170.1, 212.4; HRESIMS calcd for C<sub>13</sub>H<sub>20</sub>O<sub>3</sub>Na [M+Na]<sup>+</sup> 247.1310 found 247.1303.

Synthesis of (1*R*,2*R*)-2-methyl-3-oxo-2-(3-oxobutyl)cyclohexyl acetate (–)-(27).

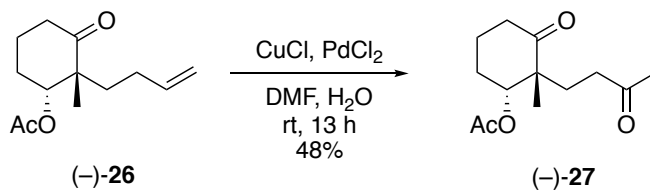

To a stirred solution of CuCl (15.9 mg, 0.16 mmol) in *N,N*-dimethylformamide (0.3 mL) and H<sub>2</sub>O (0.2 mL) was added PdCl<sub>2</sub> (4.8 mg, 26.8  $\mu$ mol) at room temperature and the mixture was stirred for 24 h at same temperature. To a stirred mixture was added

solution of (–)-**26** (30.0 mg, 0.13 mmol) in *N,N*-dimethylformamide (0.2 mL) at room temperature and mixture was stirred for 13 h at same temperature under O<sub>2</sub>. The reaction was quenched with H<sub>2</sub>O and the mixture was extracted with AcOEt. The combined organic layers were washed with brine, dried over MgSO<sub>4</sub>, and concentrated in vacuo. The resulting residue was purified by column chromatography (hexane-AcOEt, 10:1) to afford (–)-**27** (15.6 mg, 48%) as colorless oil.

$[\alpha]_{\text{D}}^{25} = -39.3$  (*c* = 0.24, CHCl<sub>3</sub>); IR (neat) 2952, 1738, 1712, 1373, 1237, 1038 cm<sup>-1</sup>; <sup>1</sup>H NMR (400 MHz, CDCl<sub>3</sub>)  $\delta$  1.07 (3H, s), 1.62-1.73 (1H, m), 1.75-1.83 (1H, m), 1.91-2.09 (4H, m), 2.05 (3H, s), 2.12 (3H, s), 2.20-2.42 (4H, m), 4.86 (1H, dd, *J* = 8.0, 3.4 Hz); <sup>13</sup>C NMR (100 MHz, CDCl<sub>3</sub>)  $\delta$  19.0, 20.4, 21.0, 25.5, 25.7, 30.0, 37.5, 37.7, 52.0, 78.2, 170.1, 208.0, 212.2; HRESIMS calcd for C<sub>13</sub>H<sub>20</sub>O<sub>4</sub>Na [M+Na]<sup>+</sup> 263.1259 found 263.1250.

Synthesis of (1*R*,2*R*)-2-(but-3-en-1-yl)-2-methyl-3-oxocyclohexyl benzoate (–)-**S6**.

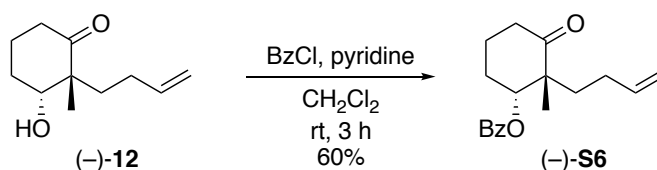

To a stirred solution of (–)-**12** (13.8 mg, 75.7  $\mu$ mol) in CH<sub>2</sub>Cl<sub>2</sub> (0.6 mL) was added pyridine (0.1 mL) and benzoyl chloride (21.0 mg, 0.02 mL, 0.15 mmol) at room temperature under Ar and the mixture was stirred for 3 h at same temperature. The reaction was quenched with 1 M HCl aqueous solution and the mixture was extracted with AcOEt. The combined organic layers were washed with brine, dried over MgSO<sub>4</sub>, and concentrated in vacuo. The resulting residue was purified by column chromatography (hexane-AcOEt, 20:1) to afford (–)-**S6** (16.7 mg, 60%) as colorless oil.

$[\alpha]_{\text{D}}^{25} = -43.1$  (*c* = 0.82, CHCl<sub>3</sub>); IR (neat) 2951, 2874, 1790, 1714, 1641, 1453, 1272 cm<sup>-1</sup>; <sup>1</sup>H NMR (400 MHz, CDCl<sub>3</sub>)  $\delta$  1.22 (3H, s), 1.73-1.90 (4H, m), 1.95-2.20 (4H, m), 2.42-2.57 (2H, m), 4.93 (1H, dd, *J* = 10.3, 1.1 Hz), 5.00 (1H, dd, *J* = 16.9, 1.4 Hz), 5.16 (1H, dd, *J* = 7.3, 3.7 Hz), 5.72-5.83 (1H, m), 7.45 (2H, t, *J* = 7.6 Hz), 7.58 (1H, t, *J* = 7.5 Hz), 8.01 (2H, d, *J* = 8.7 Hz); <sup>13</sup>C NMR (100 MHz, CDCl<sub>3</sub>)  $\delta$  19.5, 20.7, 25.6, 27.6, 31.8, 37.6, 52.7, 78.8, 114.8, 128.5 (2C), 129.6 (2C), 129.9, 133.2, 138.2, 165.5, 212.5;

HRESIMS calcd for C<sub>18</sub>H<sub>22</sub>O<sub>3</sub>Na [M+Na]<sup>+</sup> 309.1467 found 309.1458.

Optical rotation of

(2*R*,3*R*)-2-(But-3-en-1-yl)-3-(((bromomethyl)dimethylsilyl)oxy)-2-methylcyclohexan-1-one (–)-(S1)

[α]<sub>D</sub><sup>25</sup> = –26.2 (*c* 1.03, CHCl<sub>3</sub>)

Optical rotation of

(1*R*,5*S*,7*R*)-7-(But-3-en-1-yl)-3,3,7-trimethyl-2-oxa-3-silabicyclo[3.2.2]nonan-6-one (–)-(11)

[α]<sub>D</sub><sup>25</sup> = –46.8 (*c* 0.86, CHCl<sub>3</sub>)

Optical rotation of

(1*R*,5*S*,6*S*,7*R*)-7-(But-3-en-1-yl)-3,3,7-trimethyl-6-(2-methylallyl)-2-oxa-3-silabicyclo[3.2.2]nonan-6-ol (+)-(15)

[α]<sub>D</sub><sup>25</sup> = +53.6 (*c* 0.95, CHCl<sub>3</sub>)

Optical rotation of

(1*S*,2*R*,3*R*,6*R*)-2-(But-3-en-1-yl)-6-(hydroxymethyl)-2-methyl-1-(2-methylallyl)cyclohexane-1,3-diol (–)-(10)

[α]<sub>D</sub><sup>25</sup> = –6.6 (*c* 1.00, CHCl<sub>3</sub>)

Optical rotation of

(1*R*,4*R*,4*aS*,9*aR*)-4-(Hydroxymethyl)-6,9a-dimethyl-1,2,3,4,5,8,9,9a-octahydro-4*aH*-benzo[7]annulene-1,4a-diol (–)-(16)

[α]<sub>D</sub><sup>25</sup> = –56.1 (*c* 0.70, CHCl<sub>3</sub>)

Optical rotation of

(1*R*,4*R*,4*aS*,9*aR*)-1-((*tert*-Butyldimethylsilyl)oxy)-4-(((*tert*-butyldimethylsilyl)oxy)methyl)-6,9a-dimethyl-1,2,3,4,5,8,9,9a-octahydro-4*aH*-benzo[7]annulene-4a-ol (–)-(17)

[α]<sub>D</sub><sup>25</sup> = –23.0 (*c* 0.95, CHCl<sub>3</sub>)

Optical rotation of

*tert*-Butyl(((1*R*,4*R*,4*aR*,9*aS*)-4-((*tert*-butyldimethylsilyl)oxy)-4*a*,8-dimethyl-9*a*-((trimethylsilyl)oxy)-2,3,4,4*a*,5,6,9,9*a*-octahydro-1*H*-benzo[7]annulen-1-yl)methoxy)dimethylsilane (–)-(9)

$[\alpha]_{\text{D}}^{25} = -18.9$  (*c* 1.16, CHCl<sub>3</sub>)

Optical rotation of

(1*R*,4*R*,4*aS*,9*aR*)-1-((*tert*-Butyldimethylsilyl)oxy)-4-(((*tert*-butyldimethylsilyl)oxy)methyl)-6,9*a*-dimethyl-4*a*-((trimethylsilyl)oxy)decahydro-1*H*-benzo[7]annulen-7-ol (+)-(S2)

$[\alpha]_{\text{D}}^{25} = +1.84$  (*c* 1.16, CHCl<sub>3</sub>)

Optical rotation of

(1*R*,4*R*,4*aS*,9*aR*)-1-((*tert*-Butyldimethylsilyl)oxy)-4-(((*tert*-butyldimethylsilyl)oxy)methyl)-6,9*a*-dimethyl-4*a*-((trimethylsilyl)oxy)decahydro-7*H*-benzo[7]annulen-7-one (+)-(8)

$[\alpha]_{\text{D}}^{25} = +4.45$  (*c* 0.90, CHCl<sub>3</sub>)

Optical rotation of

(1*R*,4*R*,4*aS*,6*R*,9*aR*)-6-Allyl-1-((*tert*-butyldimethylsilyl)oxy)-4-(((*tert*-butyldimethylsilyl)oxy)methyl)-6,9*a*-dimethyl-4*a*-((trimethylsilyl)oxy)decahydro-7*H*-benzo[7]annulen-7-one (–)-(20)

$[\alpha]_{\text{D}}^{25} = -12.6$  (*c* 0.90, CHCl<sub>3</sub>)

Optical rotation of

(1*R*,4*R*,4*aS*,6*R*,9*aR*)-6-Allyl-1-((*tert*-butyldimethylsilyl)oxy)-4-(hydroxymethyl)-6,9*a*-dimethyl-4*a*-((trimethylsilyl)oxy)decahydro-7*H*-benzo[7]annulen-7-one (–)-(S4)

$[\alpha]_{\text{D}}^{25} = -15.9$  (*c* 0.45, CHCl<sub>3</sub>)

Optical rotation of

((1*R*,4*R*,4*aR*,8*R*,9*aS*)-8-Allyl-4-((*tert*-butyldimethylsilyl)oxy)-4*a*,8-dimethyl-7-oxo-9*a*-(trimethylsilyl)oxy)decahydro-1*H*-benzo[7]annulen-1-yl)methyl 4-methylbenzenesulfonate (–)-(21)

$[\alpha]_{\text{D}}^{25} = -10.3$  (*c* 0.36, CHCl<sub>3</sub>)

Optical rotation of

(1*R*,4*S*,4*aS*,6*R*,9*aR*)-6-Allyl-1-((*tert*-butyldimethylsilyl)oxy)-6,9*a*-dimethyl-4-((phenylselanyl)methyl)-4*a*-((trimethylsilyl)oxy)decahydro-7*H*-benzo[7]annulen-7-one (+)-(22)  
[ $\alpha$ ]<sub>D</sub><sup>25</sup> = +1.1 (*c* 0.23, CHCl<sub>3</sub>)

Optical rotation of

(1*R*,4*aS*,6*R*,9*aR*)-6-Allyl-1-((*tert*-butyldimethylsilyl)oxy)-6,9*a*-dimethyl-4-methylene-4*a*-((trimethylsilyl)oxy)decahydro-7*H*-benzo[7]annulen-7-one (–)-(23)  
[ $\alpha$ ]<sub>D</sub><sup>25</sup> = –63.4 (*c* 0.42, CHCl<sub>3</sub>)

Optical rotation of

(1*R*,4*aS*,6*R*,9*aR*)-1-((*tert*-Butyldimethylsilyl)oxy)-6,9*a*-dimethyl-4-methylene-6-((*E*)-3-(4,4,5,5-tetramethyl-1,3,2-dioxaborolan-2-yl)allyl)-4*a*-((trimethylsilyl)oxy)decahydro-7*H*-benzo[7]annulen-7-one (–)-(24)  
[ $\alpha$ ]<sub>D</sub><sup>25</sup> = –33.2 (*c* 0.53, CHCl<sub>3</sub>)

Optical rotation of

3-((1*R*,4*aS*,6*R*,9*aR*)-1-((*tert*-Butyldimethylsilyl)oxy)-6,9*a*-dimethyl-4-methylene-7-oxo-4*a*-((trimethylsilyl)oxy)decahydro-1*H*-benzo[7]annulen-6-yl)propanal (–)-(25)  
[ $\alpha$ ]<sub>D</sub><sup>25</sup> = –54.0 (*c* 0.29, CHCl<sub>3</sub>)

Optical rotation of

(1*R*,4*aS*,6*R*,9*aR*)-1-((*tert*-Butyldimethylsilyl)oxy)-6,9*a*-dimethyl-6-(4-methyl-3-oxopentyl)-4-methylene-4*a*-((trimethylsilyl)oxy)decahydro-7*H*-benzo[7]annulen-7-one (–)-(7)  
[ $\alpha$ ]<sub>D</sub><sup>25</sup> = –38.2 (*c* 0.15, CHCl<sub>3</sub>)

Optical rotation of Isolinearol (–)-(1)

[ $\alpha$ ]<sub>D</sub><sup>25</sup> = –47.4 (*c* 0.12, CHCl<sub>3</sub>)

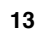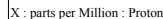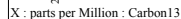

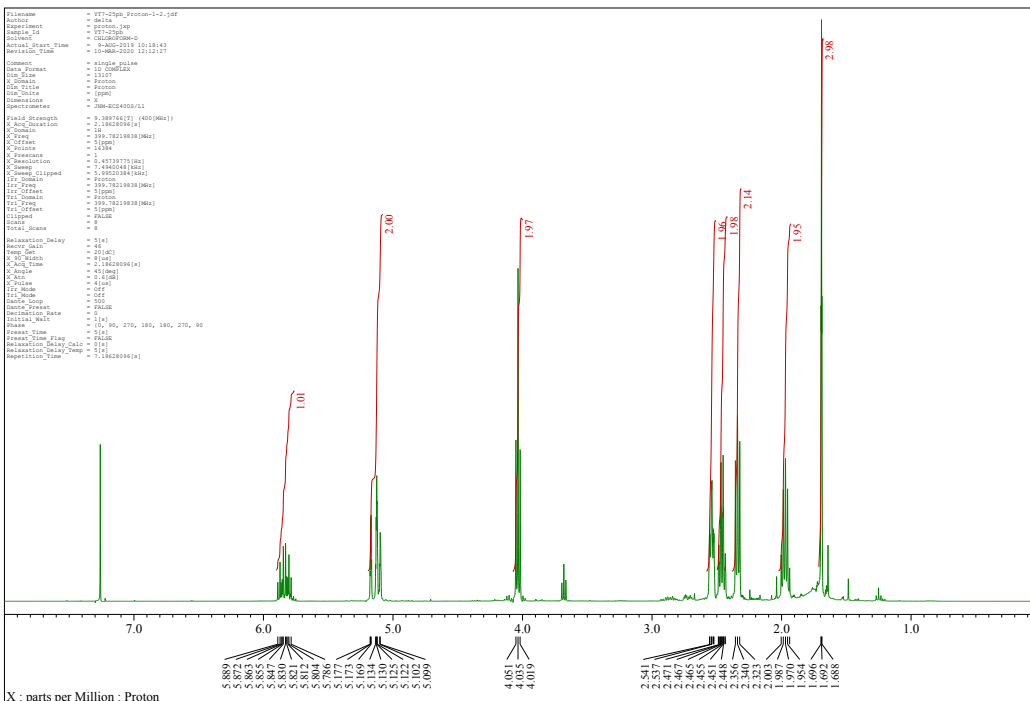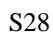



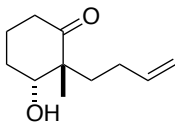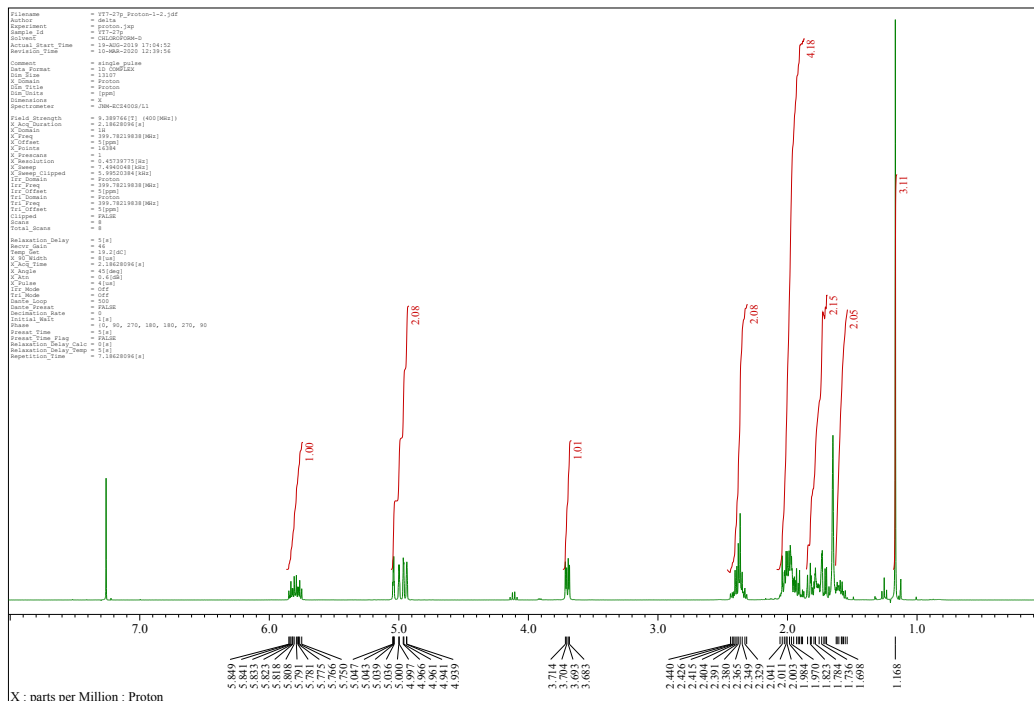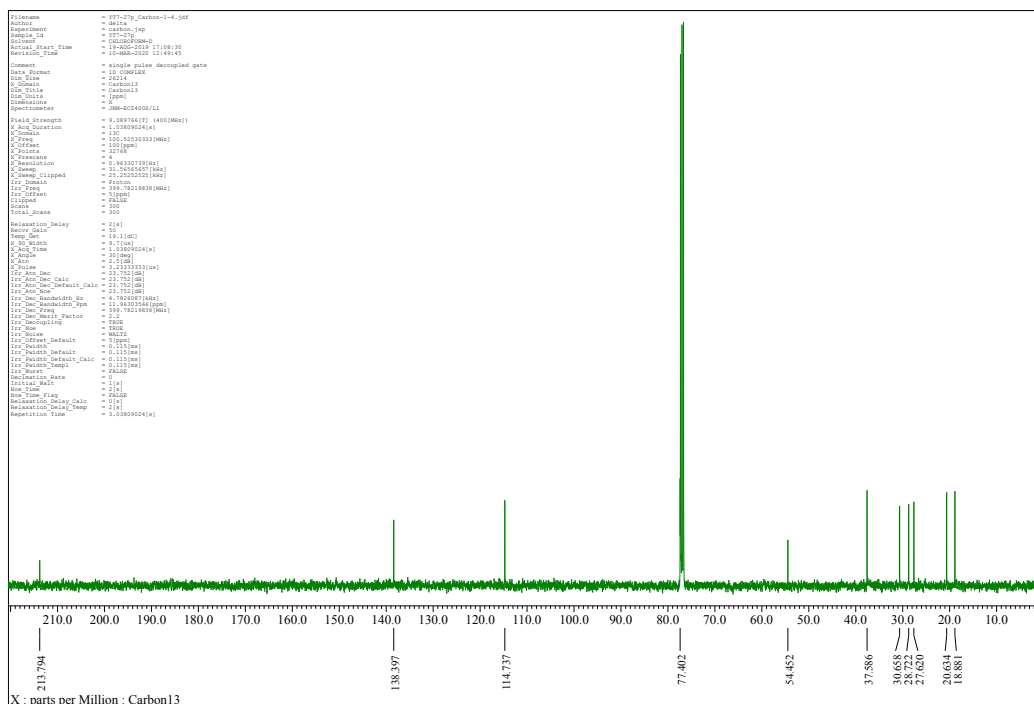

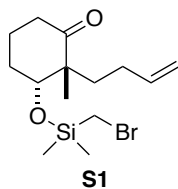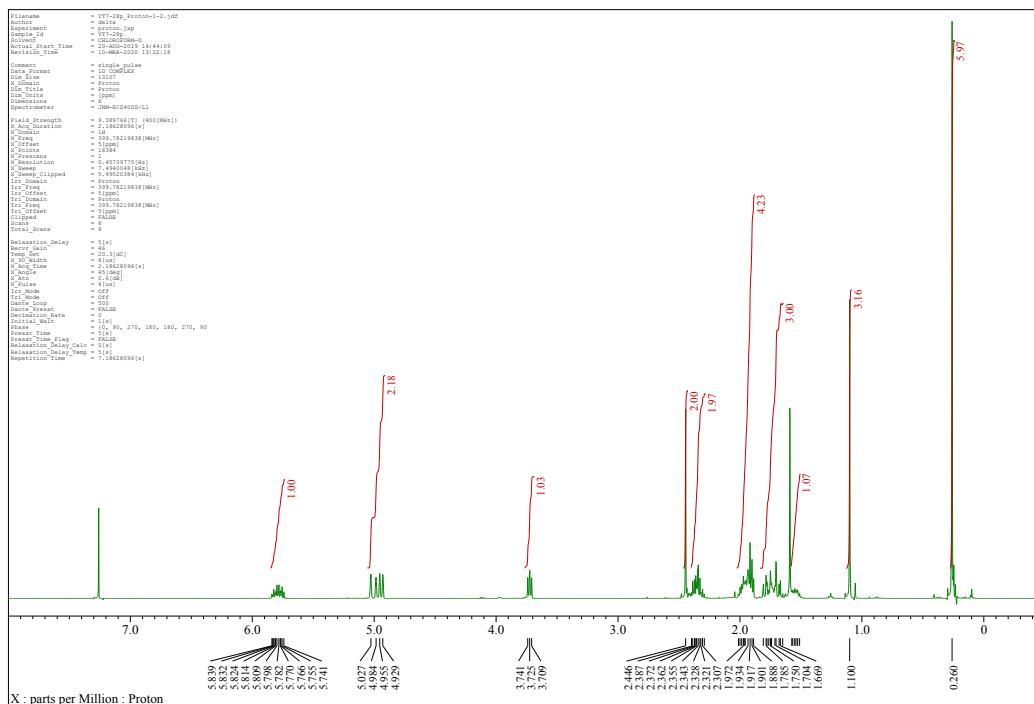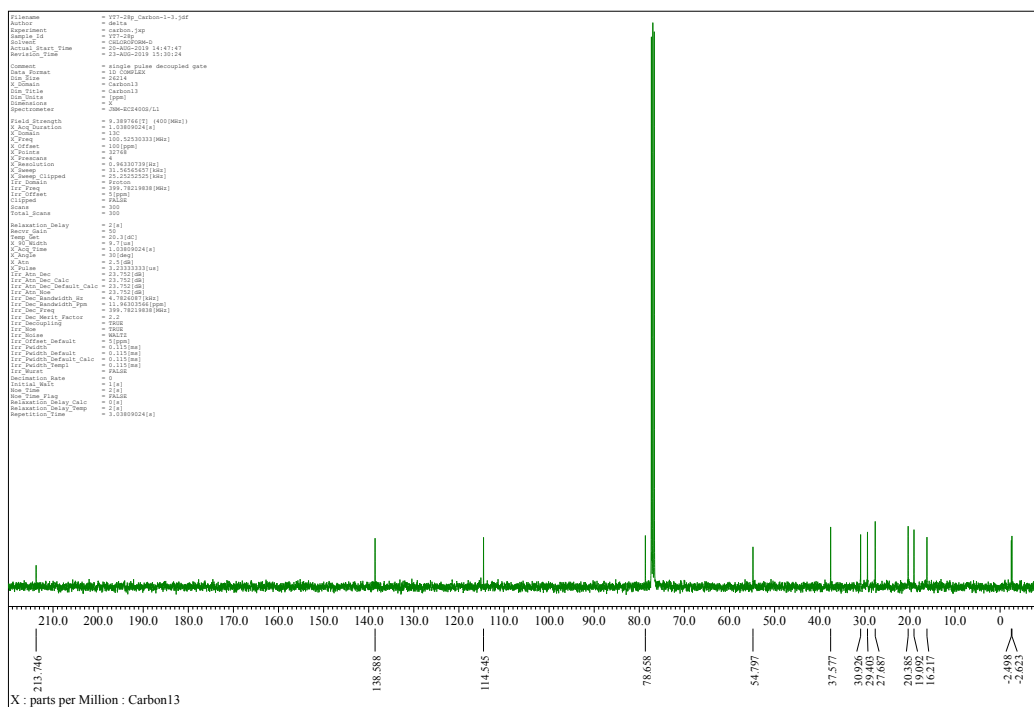

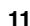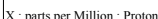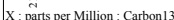

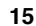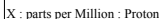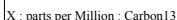

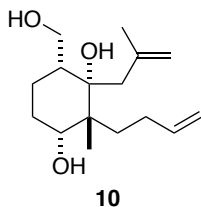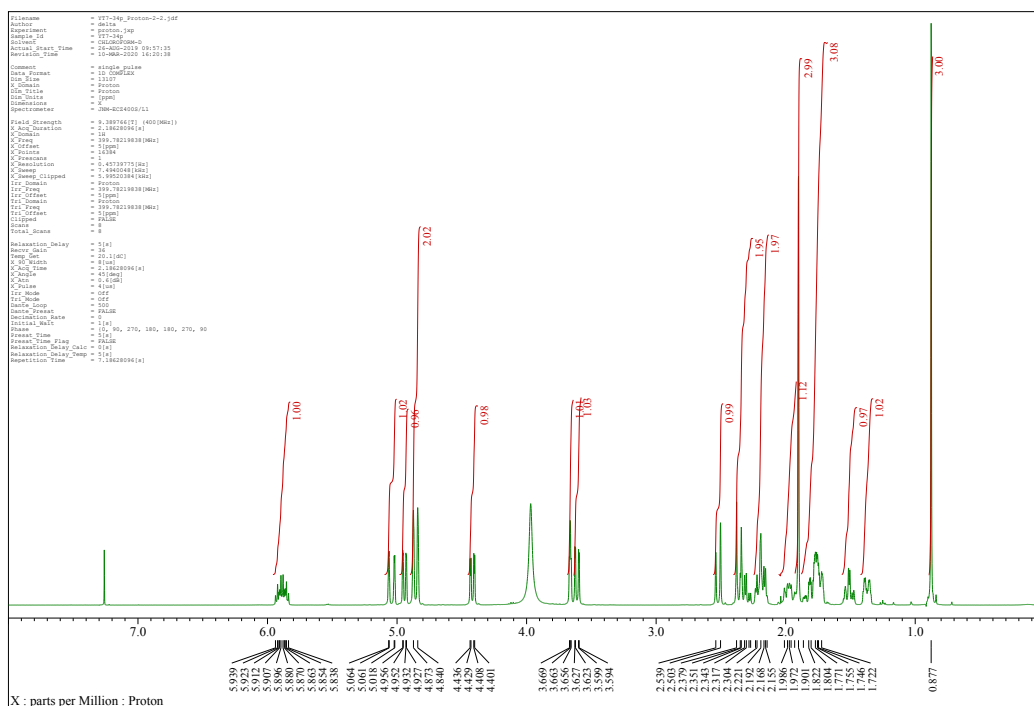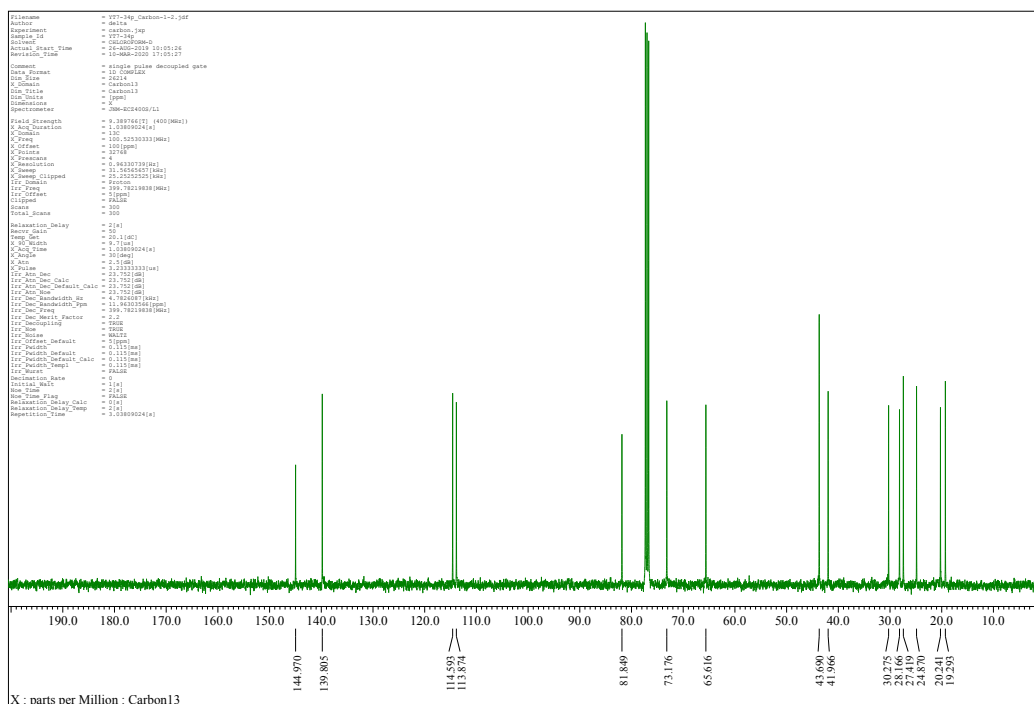

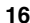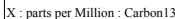

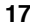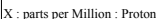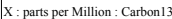

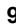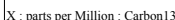



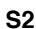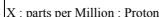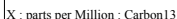

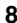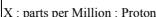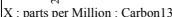

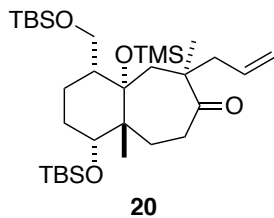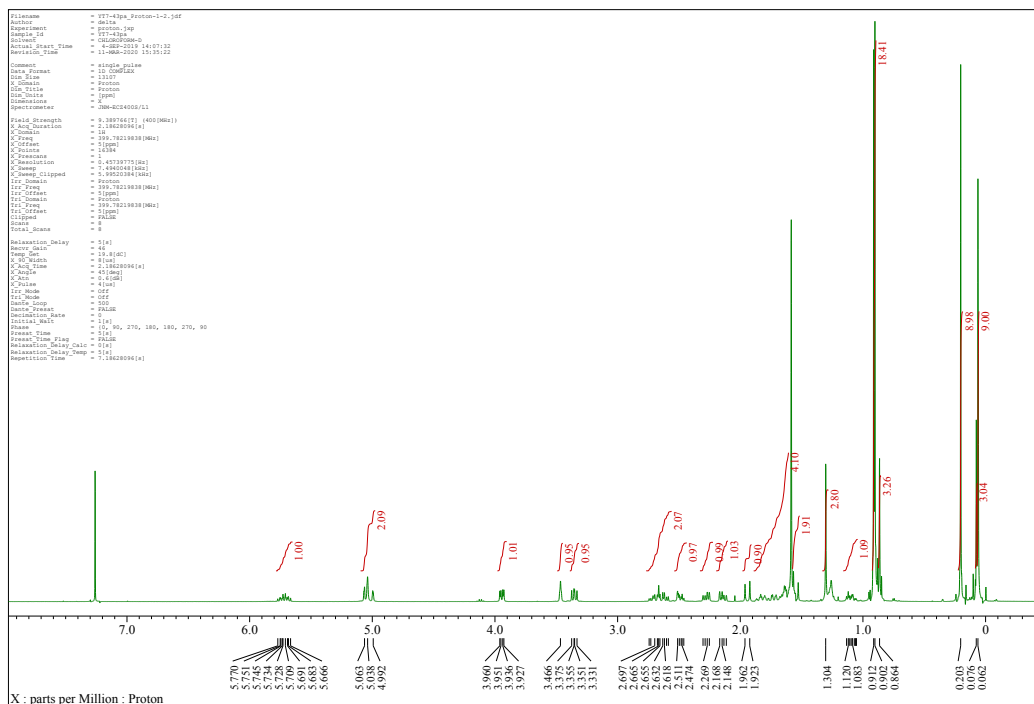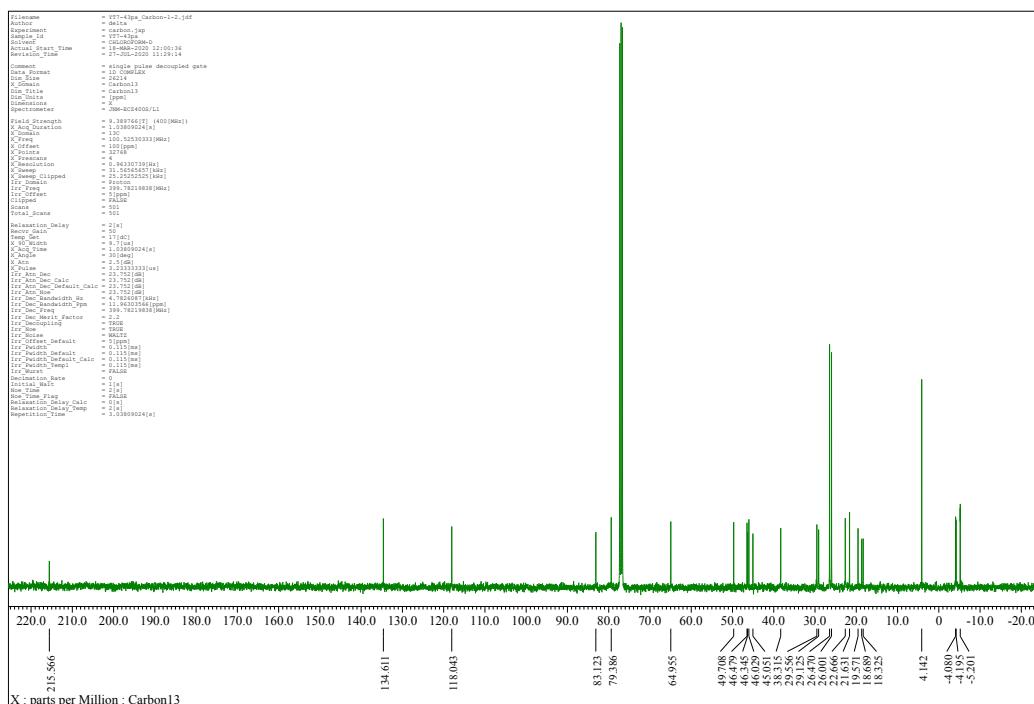

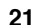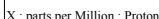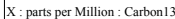

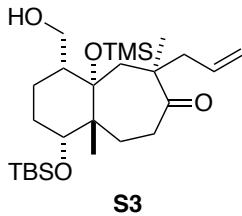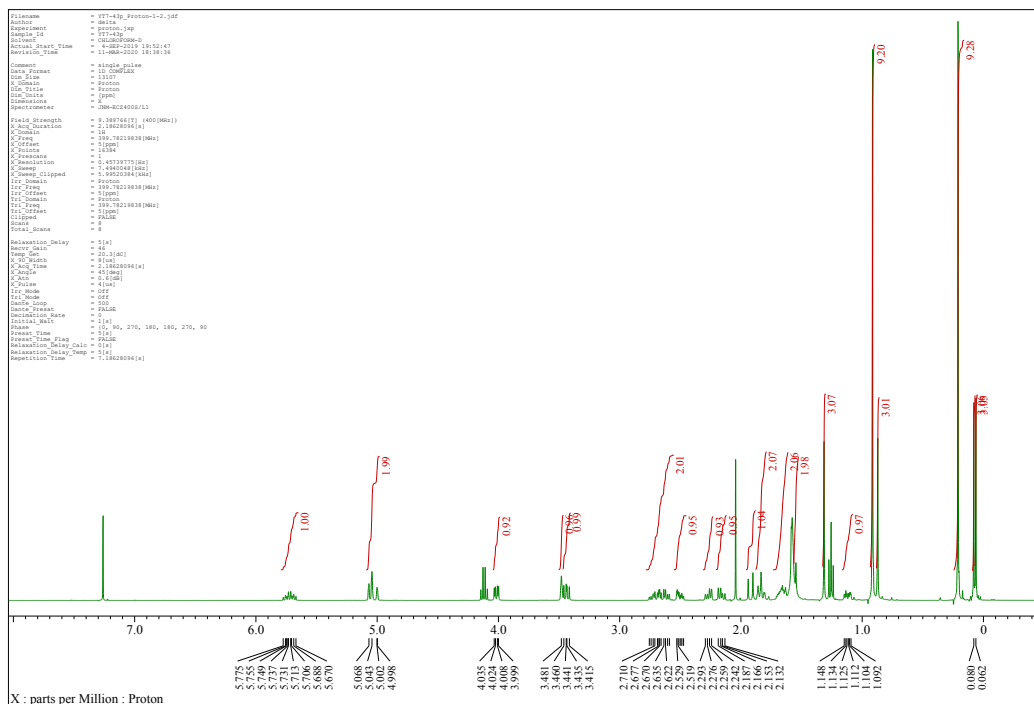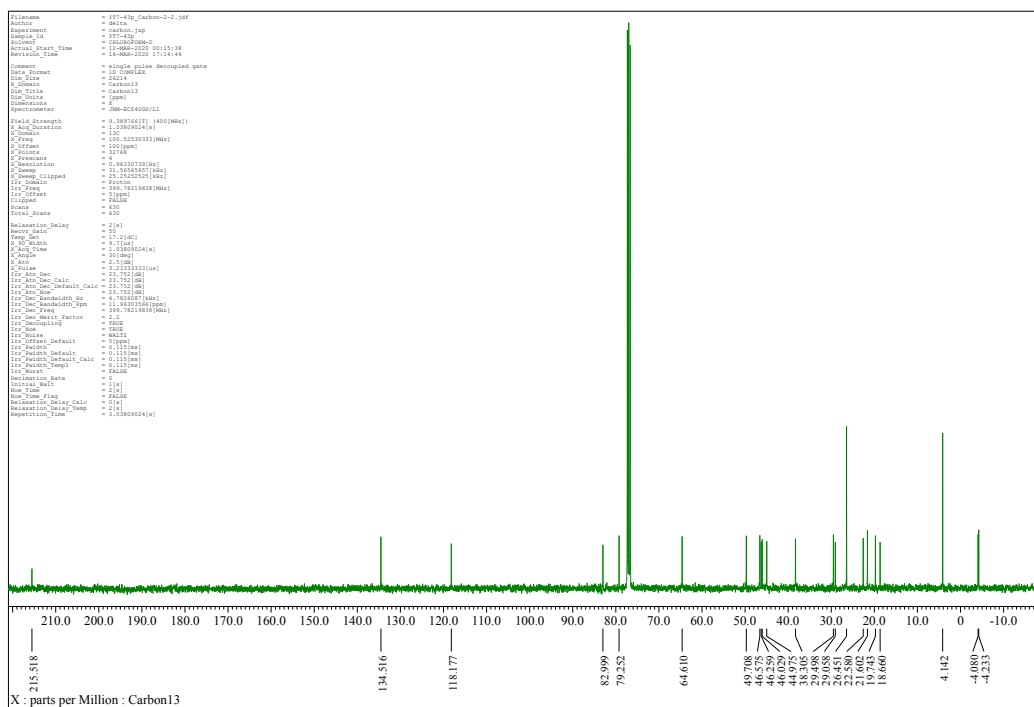

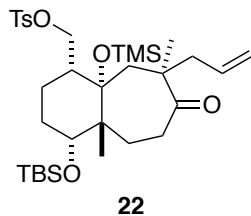

22

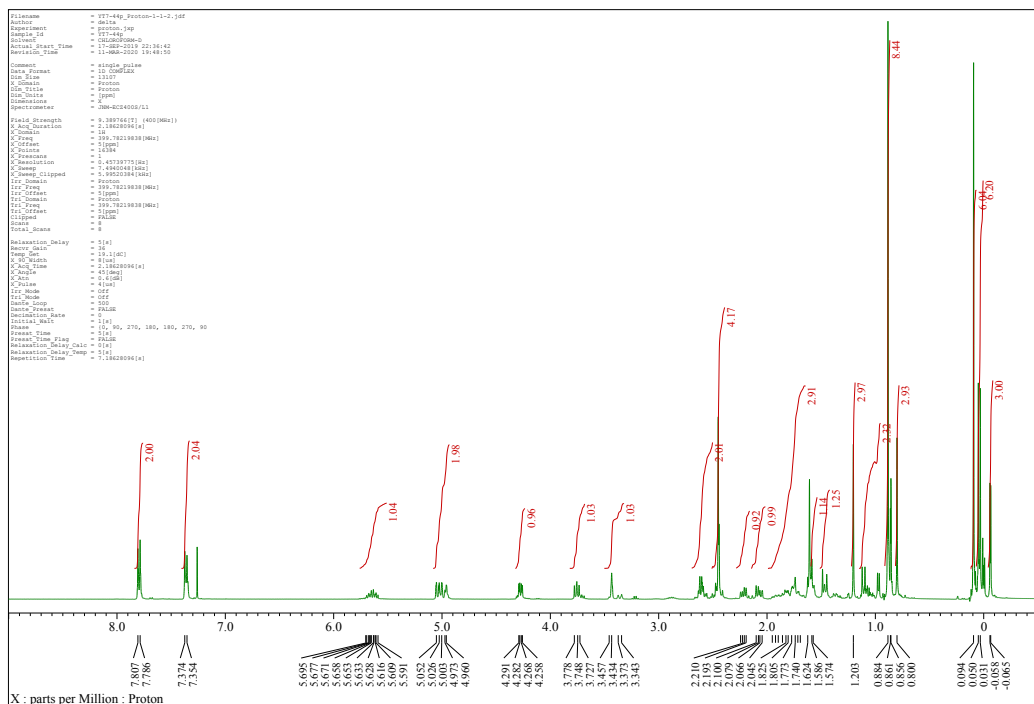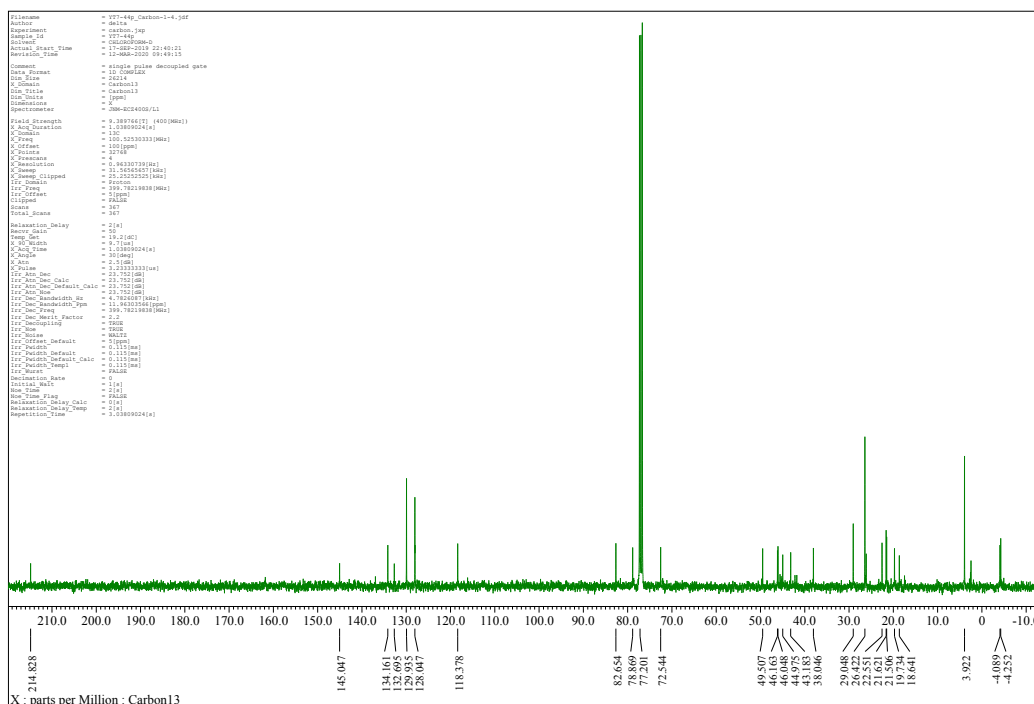

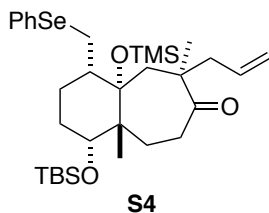

S4

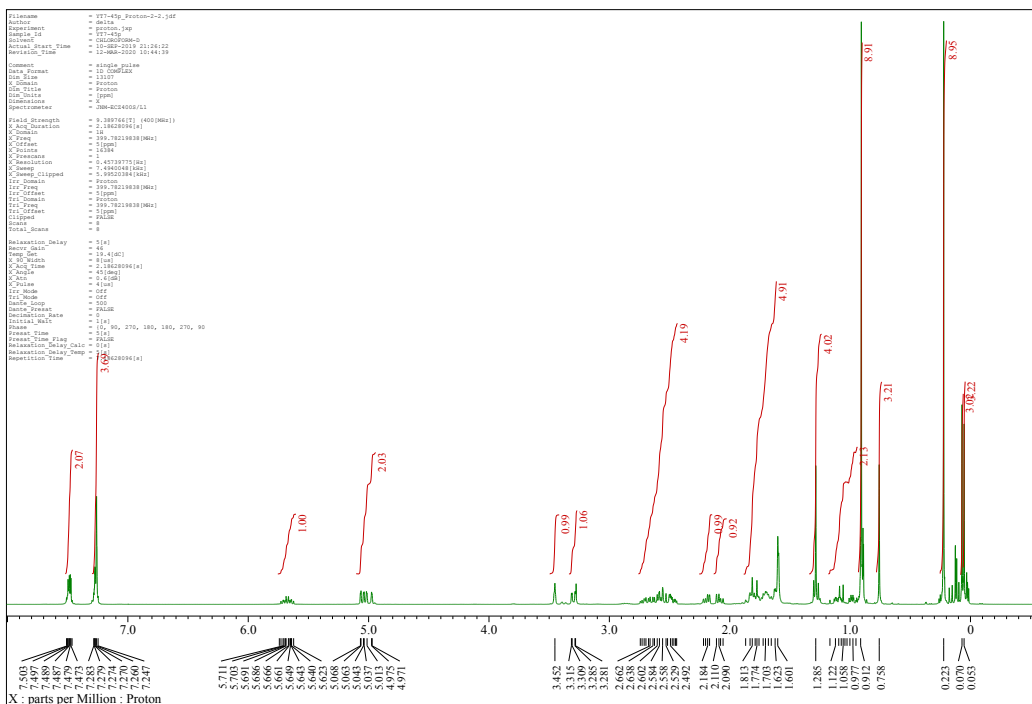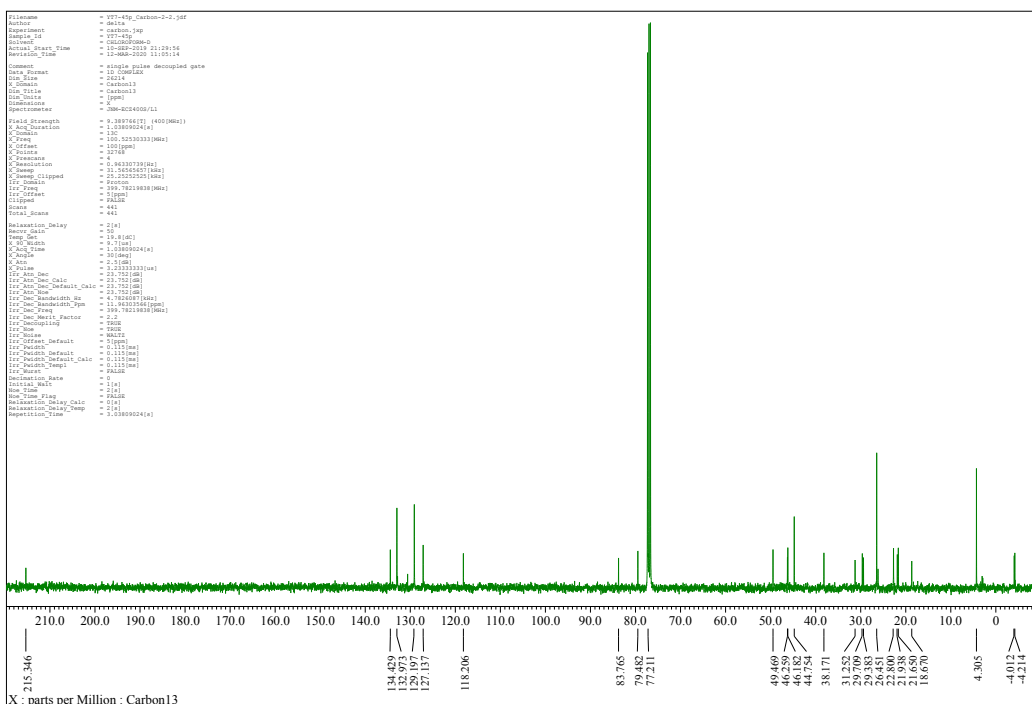

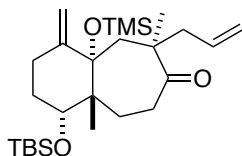

23

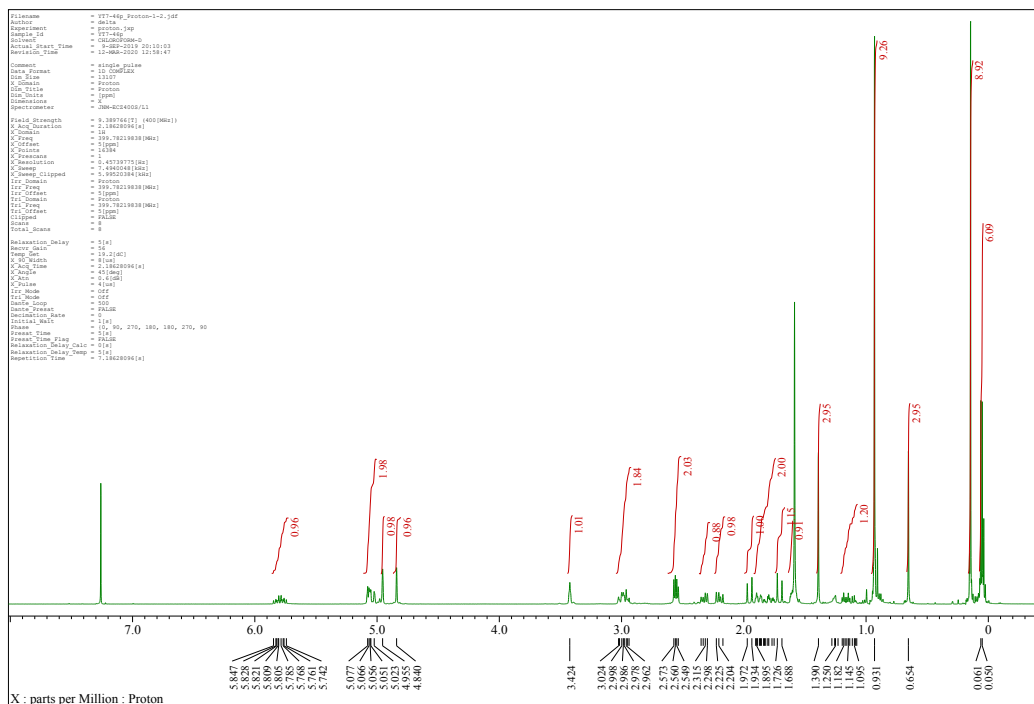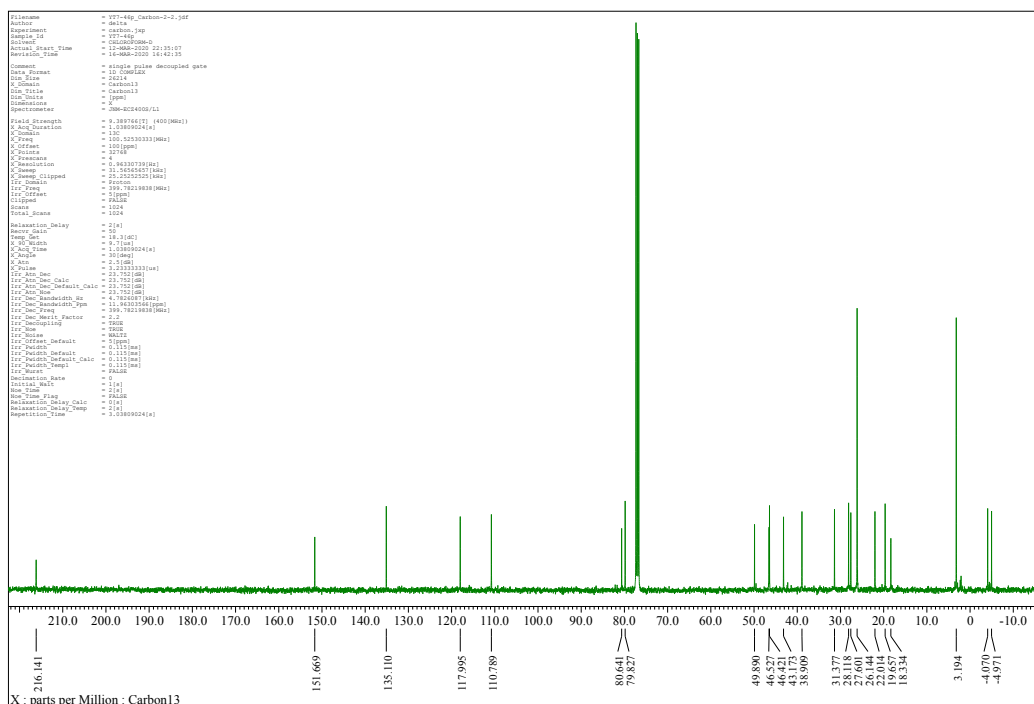



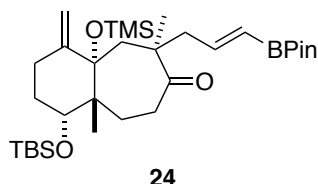

24

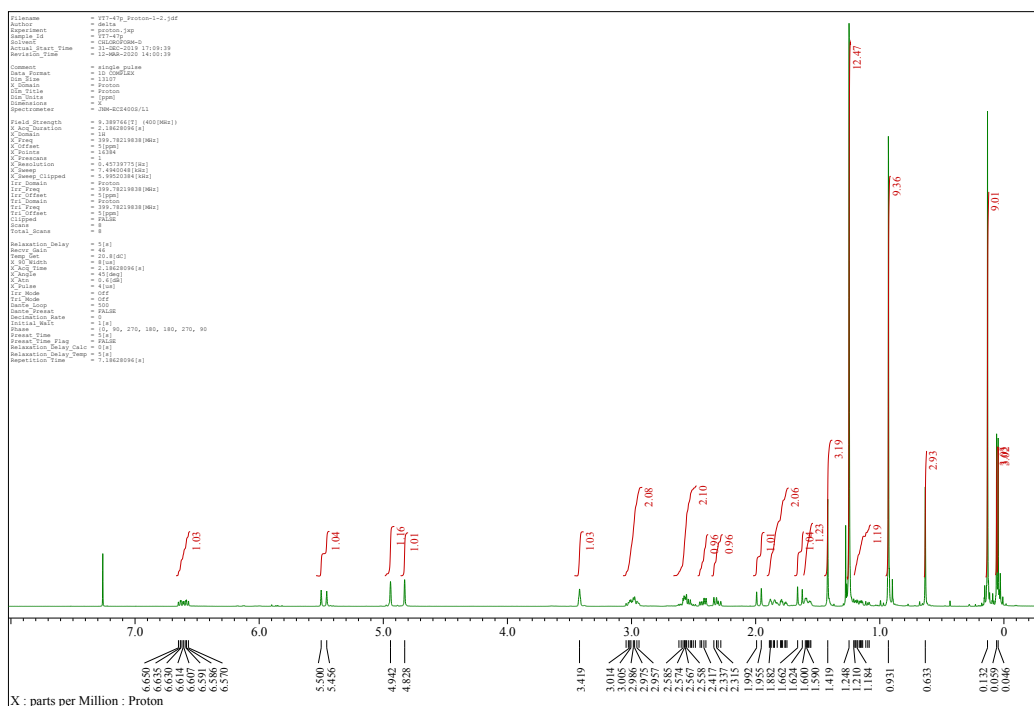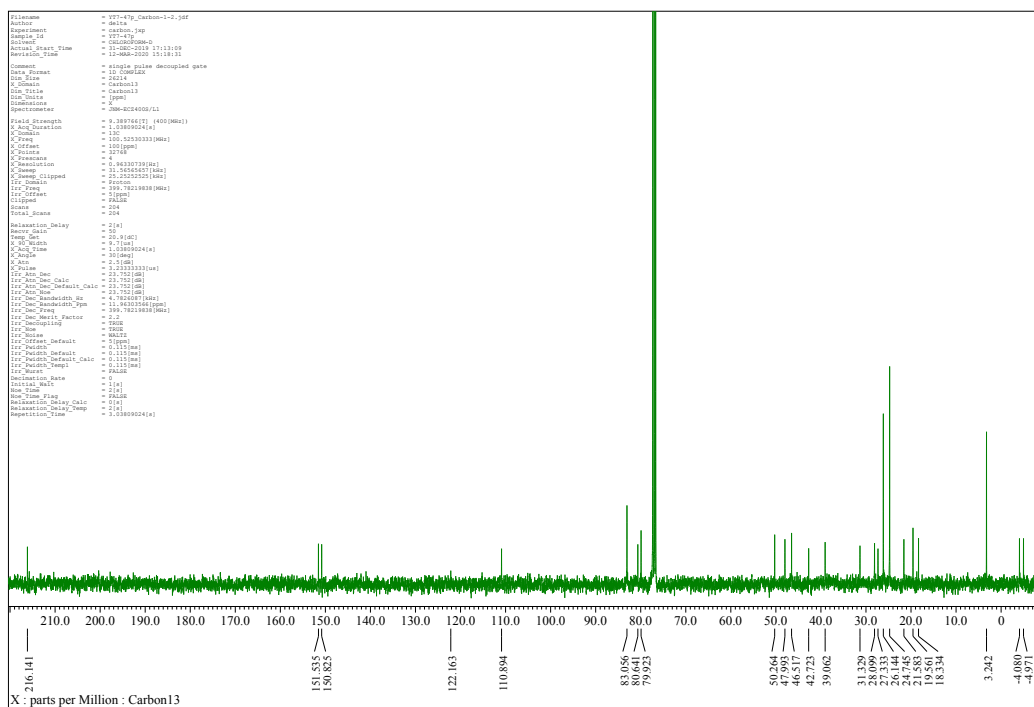

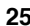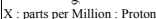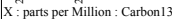

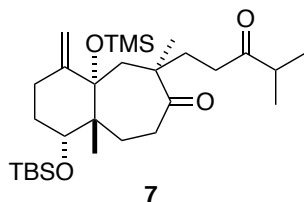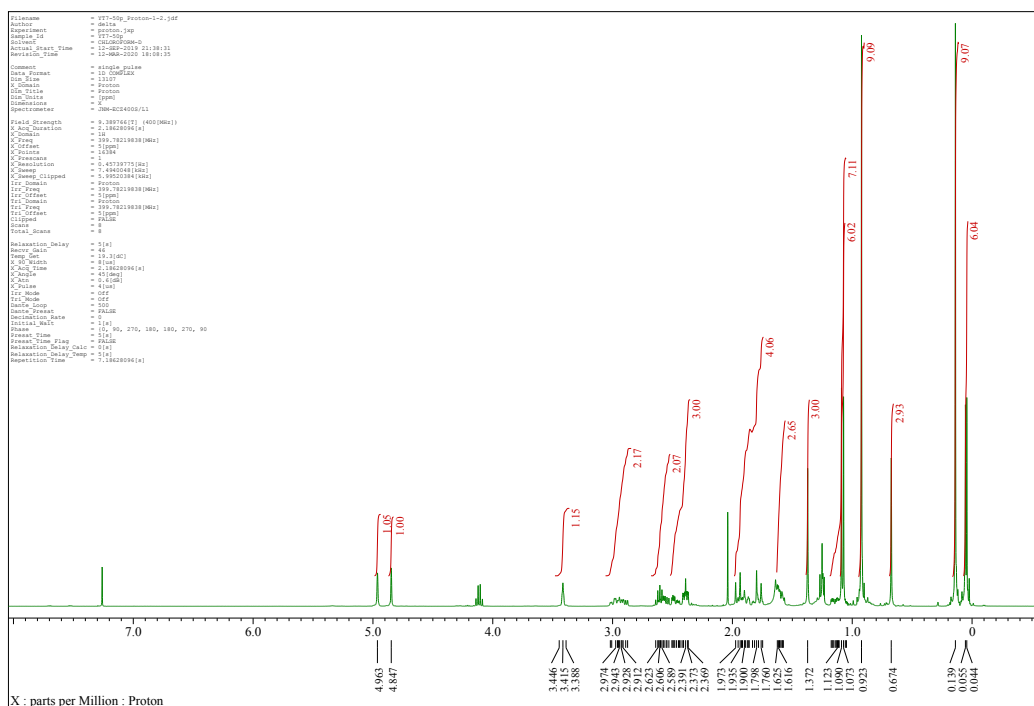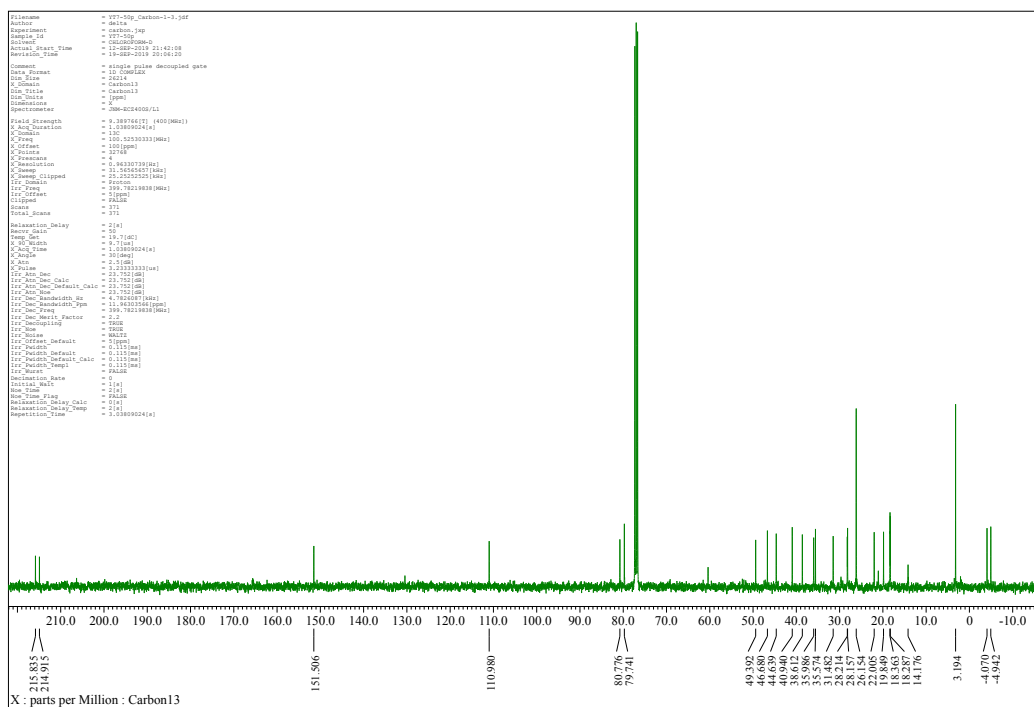

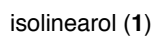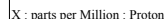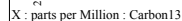

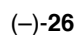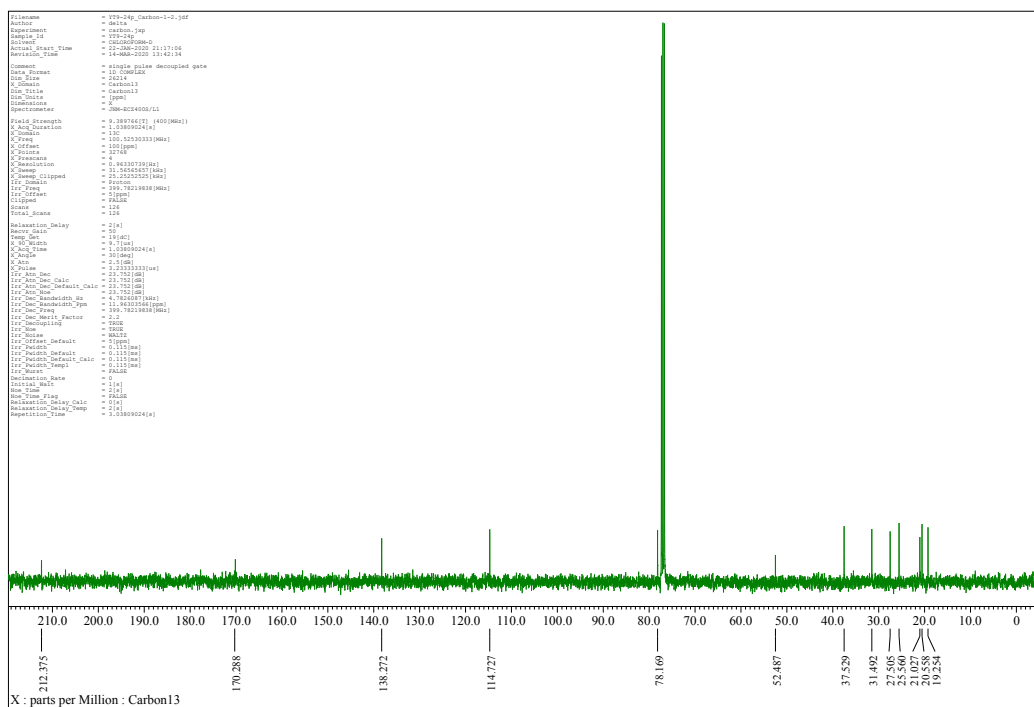

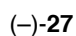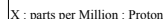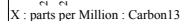

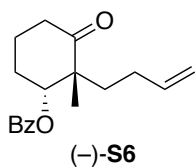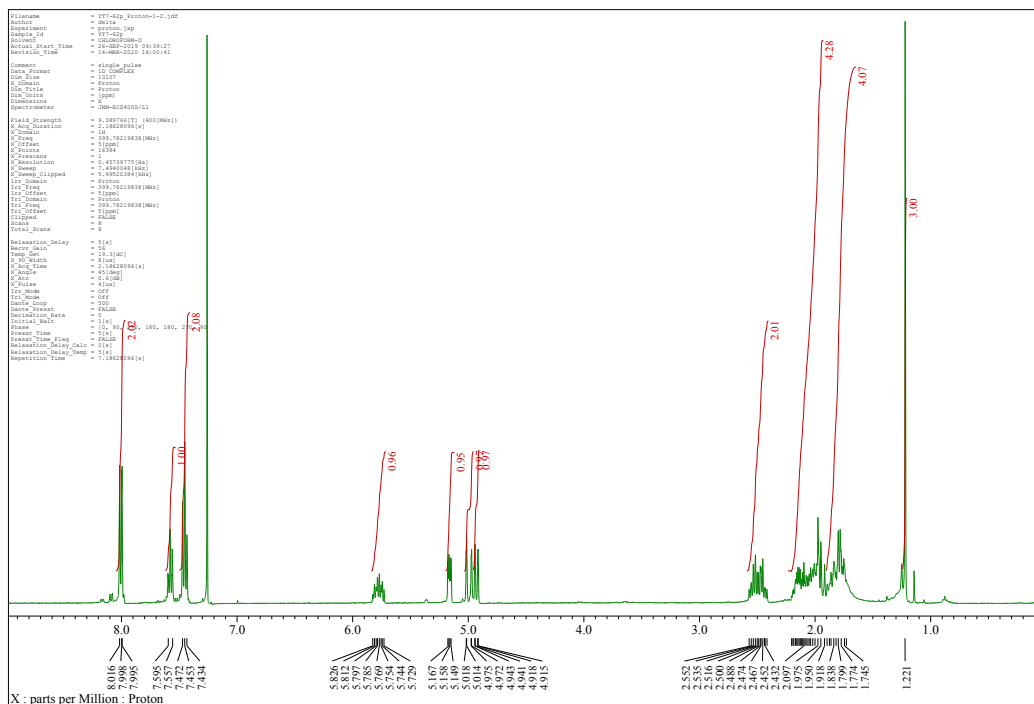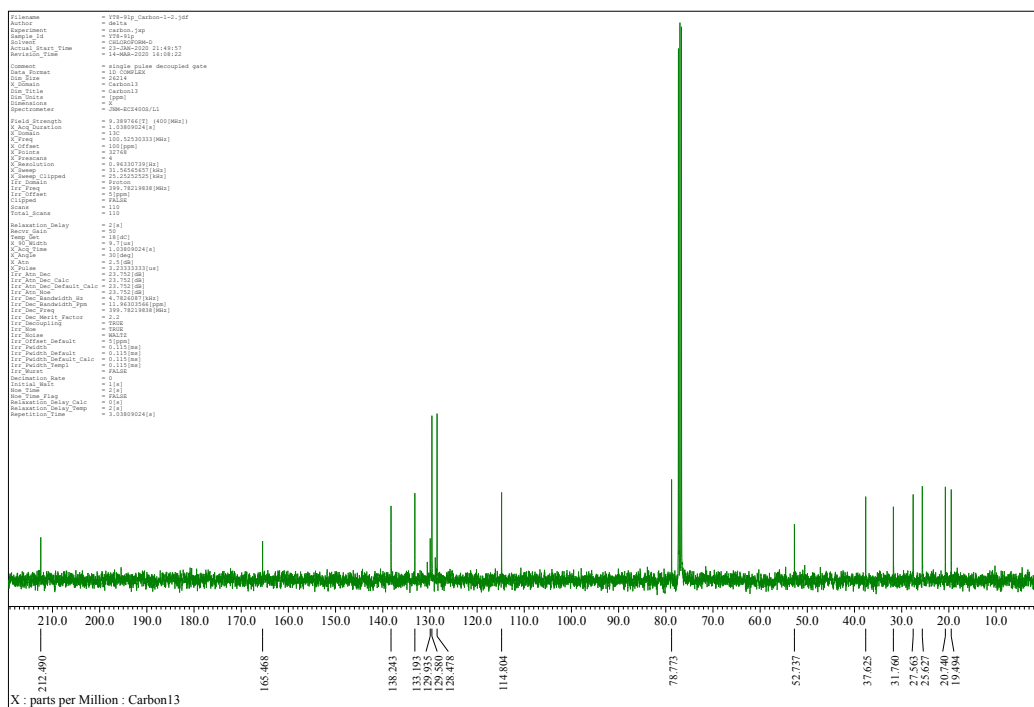

Chiralcel OD-H column, hexane : *i*PrOH = 50 : 1, 1.0 mL/min;

(+)-**S6** (minor) ;  $t_R$  = 23.7 min, (–)-**S7** (major) ;  $t_R$  = 25.5 min

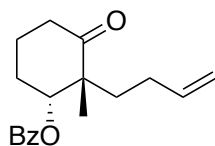

(–)-**S6**

racemic form

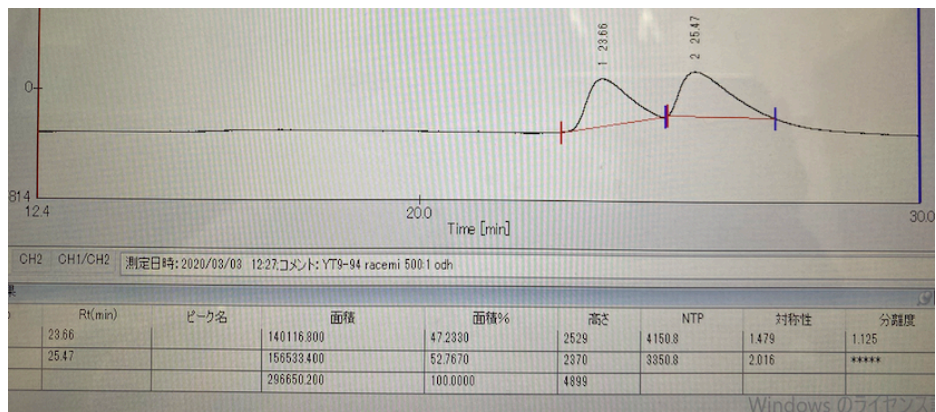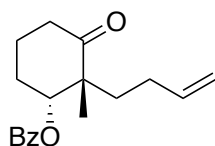

(–)-**S6**

optically active form

91% ee

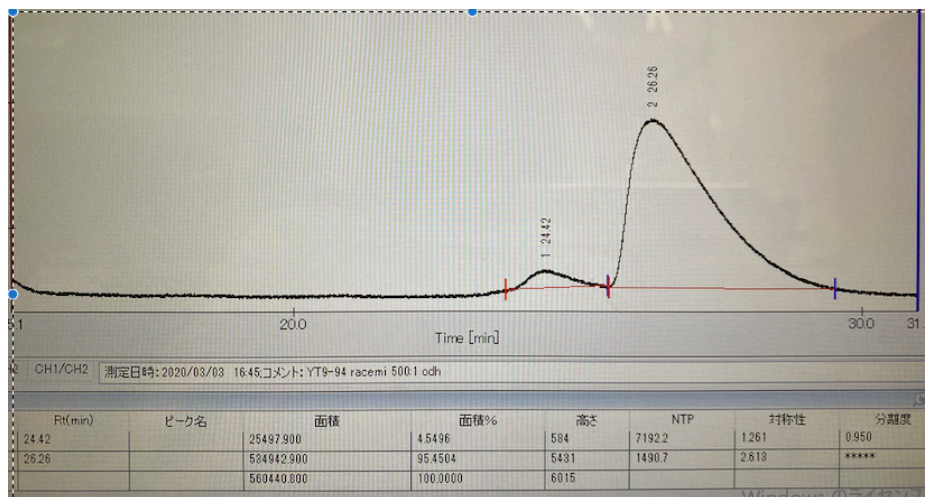



**Table S1.** Comparison of the chemical shift of  $^1\text{H}$  and  $^{13}\text{C}$  NMR spectra of isolated isolinearol with those of synthetic sample **1**.

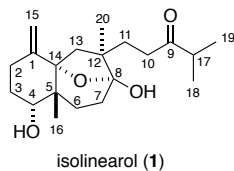

| isolated isolinearol |                                            |                                  | synthetic isolinearol |                                            |                                  |         |                                               |                                               |
|----------------------|--------------------------------------------|----------------------------------|-----------------------|--------------------------------------------|----------------------------------|---------|-----------------------------------------------|-----------------------------------------------|
| C/H no.              | $\delta_{\text{H}}$ (J in Hz) <sup>a</sup> | $\delta_{\text{C}}$ <sup>a</sup> | C/H no.               | $\delta_{\text{H}}$ (J in Hz) <sup>a</sup> | $\delta_{\text{C}}$ <sup>a</sup> | C/H no. | $\Delta\delta_{\text{H}}^{\text{iso-synthl}}$ | $\Delta\delta_{\text{C}}^{\text{iso-synthl}}$ |
| 1                    | —                                          | 146.6                            | 1                     | —                                          | 146.5                            | 1       | —                                             | 0.1                                           |
| 2                    | N/A                                        | 33.3                             | 2                     | 1.63-1.78, m<br>1.88-2.01, m               | 33.1                             | 2       | —                                             | 0.2                                           |
| 3                    | N/A                                        | 32.2                             | 3                     | 1.80-1.86, m, 2H                           | 32.0                             | 3       | —                                             | 0.2                                           |
| 4                    | 3.57, t, (4.5)                             | 78.7                             | 4                     | 3.55-3.59, m                               | 78.6                             | 4       | —                                             | 0.1                                           |
| 5                    | —                                          | 39.8                             | 5                     | —                                          | 39.8                             | 5       | —                                             | 0.0                                           |
| 6                    | N/A                                        | 31.9                             | 6                     | 1.88-2.01, m<br>2.14-2.28, m               | 31.9                             | 6       | —                                             | 0.0                                           |
| 7                    | N/A                                        | 29.8                             | 7                     | 1.63-1.78, m, 2H                           | 29.5                             | 7       | —                                             | 0.3                                           |
| 8                    | —                                          | 105.5                            | 8                     | —                                          | 105.5                            | 8       | —                                             | 0.0                                           |
| 9                    | —                                          | 214.5                            | 9                     | —                                          | 214.8                            | 9       | —                                             | 0.3                                           |
| 10                   | N/A                                        | 27.4                             | 10                    | 2.14-2.28, m<br>2.69-2.79, m               | 27.3                             | 10      | —                                             | 0.1                                           |
| 11                   | N/A                                        | 35.9                             | 11                    | 2.56-2.68, m, 2H                           | 35.8                             | 11      | —                                             | 0.1                                           |
| 12                   | —                                          | 43.4                             | 12                    | —                                          | 43.2                             | 12      | —                                             | 0.2                                           |
| 13                   | N/A                                        | 41.0                             | 13                    | 1.63-1.78, m<br>1.88-2.01, m               | 40.9                             | 13      | —                                             | 0.1                                           |
| 14                   | —                                          | 86.0                             | 14                    | —                                          | 86.0                             | 14      | —                                             | 0.0                                           |
| 15                   | 4.82, bs<br>4.97, bs                       | 109.8                            | 15                    | 4.82, bs<br>4.97, bs                       | 110.2                            | 15      | 0.00<br>0.00                                  | 0.4                                           |
| 16                   | 0.66, s, 3H                                | 22.6                             | 16                    | 0.67, s, 3H                                | 22.3                             | 16      | 0.01                                          | 0.3                                           |
| 17                   | 2.63, h, (7)                               | 41.0                             | 17                    | 2.62, qq, (6.9)                            | 41.0                             | 17      | 0.01                                          | 0.0                                           |
| 18                   | 1.10, d, (7)                               | 18.3                             | 18                    | 1.11, d, (6.9), 3H                         | 18.3                             | 18      | 0.01                                          | 0.0                                           |
| 19                   | 1.10, d, (7)                               | 18.3                             | 19                    | 1.11, d, (6.9), 3H                         | 18.4                             | 19      | 0.01                                          | 0.1                                           |
| 20                   | 1.02, s, 3H                                | 22.6                             | 20                    | 1.01, s, 3H                                | 22.6                             | 20      | 0.01                                          | 0.0                                           |

<sup>a</sup> $\text{CDCl}_3$

## X-Ray Crystallographic Data

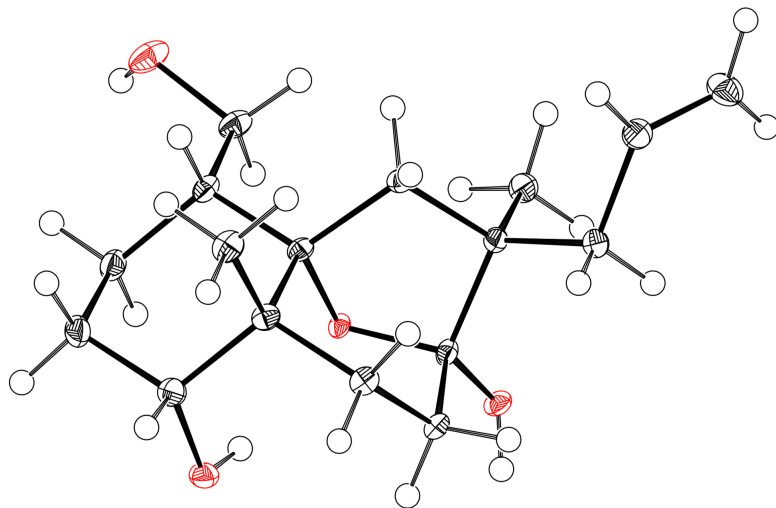

**Figure S1.** ORTEP drawing of **21**.

**Table S2.** Crystal data and structure refinement of **21**.

|                                                                            |                                                                                                                                                                                                                                                                  |
|----------------------------------------------------------------------------|------------------------------------------------------------------------------------------------------------------------------------------------------------------------------------------------------------------------------------------------------------------|
| Crystal data                                                               |                                                                                                                                                                                                                                                                  |
| Chemical formula                                                           | C <sub>17</sub> H <sub>28</sub> O <sub>4</sub>                                                                                                                                                                                                                   |
| $M_r$                                                                      | 296.39                                                                                                                                                                                                                                                           |
| Crystal system, space group                                                | Monoclinic, $P2_1/c$                                                                                                                                                                                                                                             |
| Temperature (K)                                                            | 90                                                                                                                                                                                                                                                               |
| $a, b, c$ (Å)                                                              | 15.2304 (14), 9.1246 (8), 22.238 (2)                                                                                                                                                                                                                             |
| $\beta$ (°)                                                                | 95.627 (1)                                                                                                                                                                                                                                                       |
| $V$ (Å <sup>3</sup> )                                                      | 3075.6 (5)                                                                                                                                                                                                                                                       |
| $Z$                                                                        | 8                                                                                                                                                                                                                                                                |
| Radiation type                                                             | Mo $K\alpha$                                                                                                                                                                                                                                                     |
| $\mu$ (mm <sup>-1</sup> )                                                  | 0.09                                                                                                                                                                                                                                                             |
| Crystal size (mm)                                                          | 0.32 × 0.31 × 0.12                                                                                                                                                                                                                                               |
| Data collection                                                            |                                                                                                                                                                                                                                                                  |
| Diffractometer                                                             | Bruker <i>SMART APEX II</i> Ultra                                                                                                                                                                                                                                |
| Absorption correction                                                      | Numerical<br><i>SADABS2016/2</i> (Bruker, 2016/2) was used for absorption correction. $wR2(\text{int})$ was 0.0920 before and 0.0451 after correction. The Ratio of minimum to maximum transmission is 0.9303. The $\lambda/2$ correction factor is Not present. |
| $T_{\min}, T_{\max}$                                                       | 0.930, 1.000                                                                                                                                                                                                                                                     |
| No. of measured, independent and observed [ $I > 2\sigma(I)$ ] reflections | 32814, 6332, 5308                                                                                                                                                                                                                                                |
| $R_{\text{int}}$                                                           | 0.031                                                                                                                                                                                                                                                            |
| $(\sin \theta/\lambda)_{\max}$ (Å <sup>-1</sup> )                          | 0.627                                                                                                                                                                                                                                                            |
| Refinement                                                                 |                                                                                                                                                                                                                                                                  |
| $R[F^2 > 2\sigma(F^2)], wR(F^2), S$                                        | 0.051, 0.143, 1.05                                                                                                                                                                                                                                               |
| No. of reflections                                                         | 6332                                                                                                                                                                                                                                                             |
| No. of parameters                                                          | 389                                                                                                                                                                                                                                                              |
| No. of restraints                                                          | 528                                                                                                                                                                                                                                                              |
| H-atom treatment                                                           | H-atom parameters constrained                                                                                                                                                                                                                                    |
| $\Delta\rho_{\max}, \Delta\rho_{\min}$ (e Å <sup>-3</sup> )                | 0.73, -0.27                                                                                                                                                                                                                                                      |

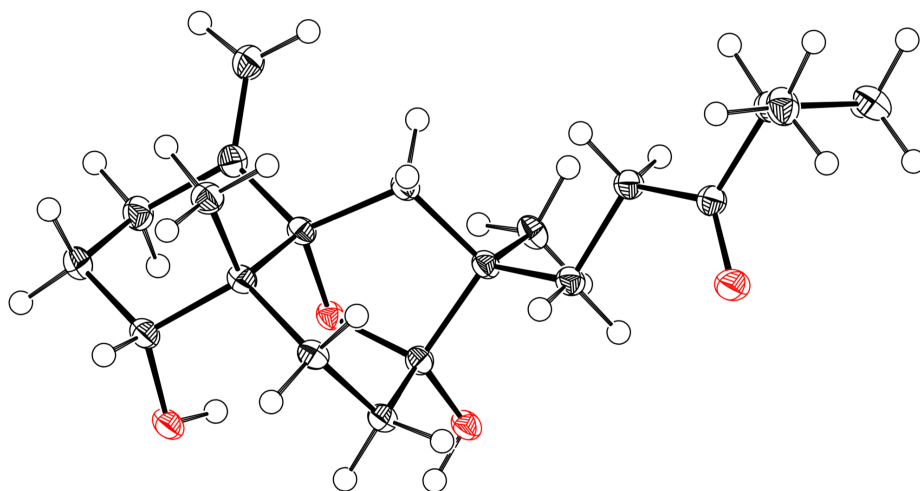

**Figure S1.** ORTEP drawing of **1**.

**Table S3.** Crystal data and structure refinement of **1**.

|                                                                                                                |                                                                                                                                                                                                                                                                      |
|----------------------------------------------------------------------------------------------------------------|----------------------------------------------------------------------------------------------------------------------------------------------------------------------------------------------------------------------------------------------------------------------|
| Crystal data                                                                                                   |                                                                                                                                                                                                                                                                      |
| Chemical formula                                                                                               | C <sub>20</sub> H <sub>32</sub> O <sub>4</sub>                                                                                                                                                                                                                       |
| <i>M<sub>r</sub></i>                                                                                           | 336.45                                                                                                                                                                                                                                                               |
| Crystal system, space group                                                                                    | Monoclinic, <i>P</i> 2 <sub>1</sub> / <i>c</i>                                                                                                                                                                                                                       |
| Temperature (K)                                                                                                | 90                                                                                                                                                                                                                                                                   |
| <i>a</i> , <i>b</i> , <i>c</i> (Å)                                                                             | 10.559 (2), 8.9149 (17), 19.341 (4)                                                                                                                                                                                                                                  |
| β (°)                                                                                                          | 92.146 (2)                                                                                                                                                                                                                                                           |
| <i>V</i> (Å <sup>3</sup> )                                                                                     | 1819.3 (6)                                                                                                                                                                                                                                                           |
| <i>Z</i>                                                                                                       | 4                                                                                                                                                                                                                                                                    |
| Radiation type                                                                                                 | Mo <i>K</i> α                                                                                                                                                                                                                                                        |
| μ (mm <sup>-1</sup> )                                                                                          | 0.08                                                                                                                                                                                                                                                                 |
| Crystal size (mm)                                                                                              | 0.23 × 0.17 × 0.08                                                                                                                                                                                                                                                   |
| Data collection                                                                                                |                                                                                                                                                                                                                                                                      |
| Diffractometer                                                                                                 | Bruker <i>SMART APEX</i> II Ultra                                                                                                                                                                                                                                    |
| Absorption correction                                                                                          | Numerical<br><i>SADABS</i> 2016/2 (Bruker, 2016/2) was used for absorption correction. <i>wR</i> <sub>2</sub> (int) was 0.1016 before and 0.0535 after correction. The Ratio of minimum to maximum transmission is 0.9601. The λ/2 correction factor is Not present. |
| <i>T<sub>min</sub></i> , <i>T<sub>max</sub></i>                                                                | 0.960, 1.000                                                                                                                                                                                                                                                         |
| No. of measured, independent and observed [ <i>I</i> > 2σ( <i>I</i> )] reflections                             | 16603, 3228, 2730                                                                                                                                                                                                                                                    |
| <i>R</i> <sub>int</sub>                                                                                        | 0.041                                                                                                                                                                                                                                                                |
| (sin θ/λ) <sub>max</sub> (Å <sup>-1</sup> )                                                                    | 0.595                                                                                                                                                                                                                                                                |
| Refinement                                                                                                     |                                                                                                                                                                                                                                                                      |
| <i>R</i> [ <i>F</i> <sup>2</sup> > 2σ( <i>F</i> <sup>2</sup> )], <i>wR</i> ( <i>F</i> <sup>2</sup> ), <i>S</i> | 0.036, 0.096, 1.01                                                                                                                                                                                                                                                   |
| No. of reflections                                                                                             | 3228                                                                                                                                                                                                                                                                 |
| No. of parameters                                                                                              | 223                                                                                                                                                                                                                                                                  |
| No. of restraints                                                                                              | 300                                                                                                                                                                                                                                                                  |
| H-atom treatment                                                                                               | H-atom parameters constrained                                                                                                                                                                                                                                        |
| Δρ <sub>max</sub> , Δρ <sub>min</sub> (e Å <sup>-3</sup> )                                                     | 0.27, -0.21                                                                                                                                                                                                                                                          |
